# Supplementary material for: Parental Perception of Weight Status: Influence on Children’s Diet in the Gateshead Millennium Study
Source: PLoS One. 2016 Feb 17;11(2):e0144931. doi: 10.1371/journal.pone.0144931 (PMC4757535; doi:10.1371/journal.pone.0144931)
Supplement: S1 Dataset — (XLS) [file pone.0144931.s001.xls]

## Sheet: Sheet1
Seq	Gender	Child_age_y	Child_BMI	Child_BMR	ei_bmr	Percent_energy_from_Fat	Percent_energy_from_Starch	Average_energy_KJ	Average_Fat_g	Average_Protein_g	Average_CHO_g	Average_Starch_g	Average_Total_Sugars_g	Average_Englyst_Fibre_g	Total_weight_g	White_breads_g	Breakfast_cereal_wholegrain_not_	Breakfast_cereal_refined_low_sug	Breakfast_cereal_refined_high_su	Chips_oven_g	Chips_fried_g	Potatoes_not_chips_g	Biscuits_g	Confectionary_cakes_sweet_puddin	Fruit_g	Fruit_juice_g	Vegetable_g	Yoghurts_g	Cheese_g	Milk_based_pudding_g	Meat_fish_non_processed_product_	Meat_fish_processed_product_g	Beans_and_pulses_g	Eggs_g	Pizza_g	Cordial_or_squash_reduced_sugar_	Cordial_or_squash_full_sugar_g	Carbonated_drink_full_sugar_g	Carbonated_drink_reduced_sugar_g	Chocolate_and_milkshake_powder_g	Water_g	Tea_Coffee_g	Crisps_and_savoury_snacks_g	Sugar_g	Spreading_fats_g	Breakfast_cereal_wholegrain_high	Meat_fish_cheese_and_egg_dishes_	Supplements_g	sex
1	2	7	15.9912	4.26	1.69997	35.26	24.3	7241.89	69.0072	56.5083	231.817	109.975	118.498	10.6152	1297.24	64.6375	0	0	7.5	24.25	0	22.375	17.1666	64.7113	73	156.8	77.45	112.738	17.8125	0	33.875	17.5625	0	12.5	22.6875	94.5	64.5	0	0	1.78125	160	0	6.08332	0	12.1575	15	0	0	Female
2	2	7	13.2982	3.631	1.90495	35.77	22.15	6916.87	66.868	51.2343	227.066	95.7409	126.873	9.96009	1367.33	57.6	28	0	0	0	25	22.375	25.5	59.25	108.625	74.2	40.1208	56.369	0	0	50.375	27.3125	0	0	45.375	0	258	0	0	0	160	0	12.1666	1.28572	6.48	0	0	0	Female
3	1	7	18.6359	4.6	1.55015	24.66	31.35	7130.69	47.531	57.7959	274.506	139.735	133.329	11.0639	1321.48	70.75	0	0	35.525	0	0	24.0833	33.9375	22	192.75	149.667	44.75	116.667	11.6917	0	20.625	44.125	20	0	0	117.4	0	0	0	0	160	0	18.75	0	6.1	0	0	0.01	Male
4	2	7	15.066	4.0985	1.46222	35.83	24.59	5992.91	58.0398	44.55	192.599	92.1185	99.1936	6.23433	1110.52	39.675	0	0	0	24.25	25	22.375	16.1875	74.095	96.5	117.6	18.25	84.5536	11.875	0	47.25	25	0	0	0	94.5	64.5	0	0	0	80	156.91	30.75	0	4.32	0	0	0	Female
5	2		15.8322			32.29	28.75	6522.74	56.9193	60.7268	211.719	117.216	90.0524	9.63538	1161.04	35.8875	0	17.1667	0	24.25	50	42.625	0	45.9225	75.25	0	60.0958	28.1845	5.9375	0	47.25	63.0625	22.5	0	45.375	47.25	0	65	136.688	0	40	39.2275	12.1666	0	4.32	0	42	0	Female
6	1	7	16.9958	4.4895	1.33578	30.27	32.87	5996.97	49.0546	43.4008	215.201	123.204	91.0792	7.30274	991.755	41.25	26.5	0	9.06668	23.3125	25.5	0	5.1875	85.2917	0	0	0	87.5	0	37.5	0	27.5	0	0	19	234.8	54.3214	0	0	0	0	0	6.25	0	5.9475	0	0	0	Male
7	2	7	14.9624	4.073	1.41044	29.05	30.51	5744.74	45.1081	40.5347	210.901	109.54	100.74	10.1905	1224.97	35.8875	0	0	15	48.5	25	44.75	24.5208	11.4613	96.125	78.4	10	0	5.9375	0	26.75	33.5625	67.5	0	22.6875	0	129	65	0	0	80	156.91	0	0	4.32	0	0	0	Female
8	1	7	14.7761	4.243	1.68252	34	23.59	7138.91	65.6102	52.2934	238.989	105.248	132.31	7.88912	1361.06	41.25	8.83333	0	0	0	51	0	26.875	79.3333	138.688	142.417	17	87.5	23.3833	0	34.875	50.25	0	0	0	117.4	54.3214	55.25	102.5	0	120	0	6.25	1.56875	12.3525	0	0	0	Male
9	1	7	17.1368	4.226	1.23626	29.28	35.84	5224.43	41.3368	42.3664	186.548	117.016	68.1441	12.2376	1095.48	27.5	17.6667	0	0	46.625	25.5	46.8333	16.5	46.0208	116.612	0	18.5	0	4.41668	0	31.125	29.25	20	0	19	176.1	54.3214	55.25	51.25	0	40	0	18.75	0	6.405	0	25	0	Male
10	1	7	15.2133	4.039	1.90972	29.77	26.43	7713.37	62.0545	59.6188	275.047	127.413	141.789	10.651	1405.83	27.5	0	0	35.7104	0	51	68.25	16.5	95.2708	54	74.8334	129.5	58.3334	5.84583	0	56.25	39.75	0	0	19	176.1	108.643	110.5	0	0	80	0	18.75	0	3.965	0	0	0	Male
11	2	7	14.9504	3.954	1.73294	30.15	32.22	6852.06	55.8373	45.7882	250.377	137.994	110.83	12.9813	1426.37	11.9625	14	0	0	0	25	22.375	40.7083	47.4613	68.5	177.25	40	112.738	11.875	0	0	16	22.5	0	22.6875	141.75	64.5	0	91.125	0	120	0	18.25	1.28572	5.6775	7.5	0	0	Female
12	1	7	16.2015	4.515	0.984518	30.03	31.09	4445.1	36.0743	40.5671	149.963	86.361	62.5789	6.37429	837.776	13.75	0	0	38.8813	23.3125	25.5	22.75	0	43.3958	71.5	30.25	20	29.1667	5.84583	0	31.125	34.125	0	0	38	58.7	0	0	0	0	160	0	6.25	0	4.27	0	22.5	0	Male
13	2	7	15.1061	3.9285	1.49757	38.05	21.28	5883.19	60.5064	51.5797	173.374	78.2383	93.1493	7.52765	1326.12	11.9625	7	7.08437	0	48.5	0	44.75	17.1666	52.75	146.125	39.2	32.5	0	5.9375	0	18.125	50.5	0	0	0	94.5	64.5	130	0	0	160	0	12.1666	1.28572	2.16	0	22.5	0	Female
14	2	7	14.7837	3.8095	1.17813	29.46	27.01	4488.08	35.7377	28.8012	167.058	75.7761	88.829	7.14419	903.41	23.925	7	0	33.2625	0	25	22.375	28.9375	31	148.75	78.4	10.65	28.1845	5.9375	24.25	34.625	0	0	0	0	141.75	129	0	0	0	0	0	6.08332	0	8.3725	0	11.75	0	Female
15	2	7	17.4262	4.5575	1.17063	33.56	31.13	5335.16	48.389	44.3867	174.042	103.793	68.8665	5.05751	997.544	35.8875	0	25.75	7.125	0	25	22.375	28.9375	30.4225	17.5	35.75	0	56.369	5.9375	0	26.75	23.75	0	0	0	0	64.5	0	91.125	0	120	156.91	12.1666	0	8.105	0	0	0	Female
16	2	7	15.1774	3.93275	1.93401	37.13	25.37	7605.98	76.3172	65.6218	228.639	120.601	107.852	8.47565	1266.89	47.85	0	0	23.3156	0	0	20.25	23.5416	59.595	83.6875	156.8	102.062	56.369	23.75	0	33.25	48.5	0	12.5	0	94.5	0	0	0	0	160	0	6.08332	0	6.48	0	0	0	Female
17	2	7	13.4192	3.79675	1.81782	31.17	25.87	6901.8	58.1468	49.0416	244.232	111.603	129.348	11.4052	1408.92	35.8875	7	0	22.5	0	25	22.375	22.5625	94.8838	216.112	156.8	63.5917	84.5536	0	0	33.875	31	0	0	22.6875	141.75	0	0	0	0	120	0	12.1666	0	4.32	0	0	0	Female
18	2	7	14.9819	3.8775	2.14586	34.54	21.05	8320.57	77.6749	41.9444	295.993	109.472	178.912	8.63643	1133.36	35.8875	0	0	0	24.25	50	0	30.8958	136.173	212	74.95	12	0	11.875	0	15.75	27.3125	0	0	45.375	141.75	64.5	130	0	0	40	0	24.3333	0	6.48	0	0	0	Female
19	1	6	22.8308	5.36075	1.29546	35.91	23.56	6944.62	67.4047	59.9979	214.554	102.241	110.402	8.10749	1286.47	41.7525	0	0	0	20	0	22.5	30.7875	76.1375	90.2841	41	34.5625	55	19.2593	24.5	52.65	20.75	0	14.25	0	49.375	148	0	150.75	0	40	0	25	0	3.795	0	19.5	0	Male
20	2	7	14.4982	3.784	1.67853	24.09	23.67	6351.57	41.3551	41.6369	257.143	93.9612	162.384	8.36706	995.234	47.85	7	0	7.5	0	25	44.75	19.125	7.25	97.5	0	38.5	28.1845	0	0	52.75	34	22.5	0	0	47.25	258	0	0	0	120	0	12.1666	0	12.1575	0	0	0	Female
21	2	7	15.2379	4.28125	1.5644	37.09	22.11	6697.59	67.138	47.0254	213.479	92.5553	114.202	12.2045	1111.65	47.85	0	0	0	24.25	0	44.75	11.7708	46.9613	335.612	0	85.8417	0	23.75	0	35.375	38.625	22.5	0	22.6875	94.5	129	0	91.125	0	0	0	18.25	1.28572	9.9975	0	0	0	Female
22	1	7	17.0515	4.345	1.63258	34.13	28.73	7093.56	65.4408	53.2515	235.524	127.367	109.396	9.3966	1131.58	50.75	0	14.375	0	0	51	45.5	18.375	48.0417	83.75	30.25	37.25	116.667	11.6917	26.75	14	11.5	0	0	19	117.4	0	0	0	0	160	0	11.5	0	5.9475	0	0	0	Male
23	2	7	19.2178	4.5915	1.42406	31.94	28.29	6538.58	56.4496	38.77	237.137	115.593	120.489	8.48668	1138.08	35.8875	0	0	24.9469	0	50	42.625	11.7708	52.4225	43	0	19.625	0	0	0	21.25	37.625	45	0	22.6875	47.25	129	195	91.125	0	80	0	18.25	1.28572	6.2125	0	0	0	Female
24	1	6	15.0292	3.91575	1.79615	33.05	30.36	7033.28	62.8266	62.5943	227.861	133.457	94.1454	8.30173	1252.55	69.0025	0	0	9.125	0	24.5625	45	12.1125	31.0584	97.1364	41	0	82.5	0	0	79.925	70.6833	0	0	0	98.75	113	108.75	0	0	120	78.455	18.75	0	10.5	0	19.75	0	Male
25	2	7	18.3627	4.464	1.5992	37.74	26.52	7138.85	72.8144	56.4279	218.179	118.339	99.1608	12.5737	1270.15	34.9625	33.5	0	15.4406	0	50	67.125	11.7708	49.4613	166.875	39.2	87.7458	56.369	0	0	26.25	68.0625	22.5	0	0	0	0	65	0	0	40	0	12.1666	1.28572	1.8925	7.5	19.5	0	Female
26	1	7	13.785	3.767	1.92676	32.1	30.57	7258.1	62.9662	67.1147	236.969	138.672	97.1998	9.11677	1301.11	57	0	0	34.7	46.625	0	45.5	6.125	54.5417	66	0	43.5	29.1667	17.5375	0	58.25	11.5	20	25	38	234.8	0	0	153.75	0	0	0	12.5	0	4.27	0	0	0	Male
27	1	7	17.1508	4.226	1.55524	34.23	25.99	6572.45	60.8097	45.2453	222.183	106.751	112.091	8.83015	1370.39	55	0	0	0	23.3125	51	22.75	6.125	121	54	112.25	19.25	58.3334	0	0	40.25	63.625	20	0	19	234.8	54.3214	0	153.75	2.75	160	0	25	0	10.5225	0	0	0	Male
28	2	6	16.835	4.056	1.28696	36.29	29.71	5219.92	51.2011	47.5265	157.522	96.9368	58.6245	6.9977	938.188	42.88	0	0	30	23.25	0	87.3292	0	53.3	25.025	33.25	38.0375	65.5	12.5	0	28.95	55.3125	20	0	0	0	0	0	0	2.25	160	0	6.25	0	7.555	0	0	0	Female
29	2	7	14.5156	3.90725	1.47346	37.34	23.68	5757.18	58.1036	53.1995	168.983	85.2014	80.1434	7.60631	995.74	35.8875	0	0	8.31563	24.25	25	20.25	25.5	50.25	107.25	156.8	27.1208	28.1845	11.875	0	57.5	50.8125	0	25	0	0	0	65	0	0	160	0	12.1666	0	2.16	0	0	0.01	Female
30	1	7	15.8584	3.9115	1.87063	34.62	22.27	7316.99	68.4562	51.8402	244.065	101.825	137.231	7.65273	1240.48	27.5	0	15	0	0	0	45.5	22.625	137.375	49.25	0	54	58.3334	10.2625	0	51.25	25.5	0	0	19	234.8	162.964	0	0	0	40	39.2275	12.5	0	10.065	0	0	0	Male
31	1	7	14.6996	4.0135	1.72224	31.24	35.68	6912.19	58.3527	53.9019	239.645	154.155	82.5224	13.0994	1379.15	41.25	8.83333	7.5	7.5	46.625	76.5	68.25	10.375	34.5208	76.25	74.8334	45.25	29.1667	0	0	24.25	60.375	40	0	38	176.1	54.3214	55.25	0	0	40	39.2275	6.25	0	8.54	0	0	0	Male
32	2	7	16.1773	4.2005	1.59165	28.72	29.51	6685.72	51.8908	51.5864	241.704	123.322	117.837	11.666	1562.35	35.8875	0	0	30	48.5	25	22.375	5.39582	17.9613	137	146.45	78.025	84.5536	0	24.25	50.25	26.5	22.5	0	0	141.75	129	0	91.125	0	160	0	24.3333	0	8.64	0	19.5	0	Female
33	2	7	18.7705	4.566	1.51885	33.68	22.72	6935.06	63.1305	52.7612	231.603	98.4571	131.335	9.46421	1529.43	23.925	33.5	0	8.31563	0	25	62.875	23.5416	82.2113	93.8625	149.9	74.2458	28.1845	5.9375	0	33.875	37.5	22.5	0	0	0	64.5	130	45.5625	7.125	160	39.2275	24.3333	2.57145	6.48	0	21.5	0	Female
34	1	7	19.9467	4.9315	1.69909	33.25	27.81	8379.08	75.3019	65.5165	279.227	145.664	130.172	9.49717	1354.4	64.75	0	0	0	0	25.5	69.5833	21.6875	69.0625	49.25	37.4167	85.5	29.1667	0	0	64.625	16.25	0	0	0	0	267.964	165.75	51.25	0	0	0	12.5	0	8.235	0	26	0	Male
35	1	7	15.6609	4.2345	1.33623	33.48	25.6	5658.26	51.2072	58.4505	173.439	90.5469	81.0918	14.2139	1202.46	13.75	26.5	0	0	0	0	92.3333	10.375	138.75	129.75	112.25	102.5	0	17.5375	0	83.5	30	20	12.5	0	0	0	55.25	0	0	160	0	12.5	0	1.9825	0	0	0	Male
36	1	7	15.4029	4.158	1.56948	22.27	26.98	6525.89	39.2808	47.4188	266.877	110.036	154.994	7.41198	1243.25	55	0	0	35.525	0	0	22.75	6.125	52.9167	101	149.667	59.75	58.3334	11.6917	0	20.875	30	3.25	0	19	0	0	221	0	0	160	27	12.5	0	0	0	0	0	Male
37	1	7	16.598	3.94125	1.90422	39.07	26.53	7505.01	79.2394	55.7617	226.032	124.438	100.487	10.016	1414.33	64.75	0	0	0	23.3125	25.5	46.8333	0	117.917	93.625	149.667	37	0	11.6917	0	10	91.875	20	25	0	234.8	0	0	153.75	0	80	0	18.75	0	8.54	8.25	0	0	Male
38	2	7	20.726	4.94425	1.40045	35.45	22.47	6924.16	66.3497	55.8764	219.513	97.2622	120.703	8.38067	1401.24	45.6375	7	8.58333	0	48.5	0	0	23.5416	90.2113	136.75	114.15	36.625	56.369	19.375	0	48.75	22.625	0	25	22.6875	94.5	0	195	45.5625	0	160	0	18.25	2.57145	1.8925	0	19.5	0	Female
39	1	7	16.7948	4.294	1.59526	28.87	25.42	6850.04	53.4545	55.0954	245.418	108.837	134.549	11.459	1537.29	25	0	15	13.5	46.625	0	22.75	16.5	58.6458	146.75	170.25	80	116.667	4.41668	0	39.125	23.75	0	12.5	0	58.7	162.964	0	51.25	7.8125	120	0	6.25	1.56875	7.93	6	17.25	0	Male
40	2	7	15.1923	3.8265	2.06061	35.34	26.23	7884.91	75.3182	52.7675	262.75	129.265	132.269	10.3022	1499.21	47.85	0	0	0	0	50	107.625	24.5208	73.2113	91.25	156.8	36.4708	28.1845	11.875	24.25	32.25	42	0	37.5	0	47.25	64.5	195	136.688	0	80	0	24.3333	0	9.73	0	32.5	0	Female
41	1	7	15.7356	4.1835	1.79388	34.56	32.53	7504.71	70.088	60.4042	243.221	152.582	89.872	11.3331	1370.92	41.25	134	22.5	0	0	0	115.083	16.5	63.0625	49.5	0	77	29.1667	16.1083	26.75	55.125	23.75	0	0	0	0	89.3214	0	0	3.90625	160	0	18.75	0	10.2175	0	0	0	Male
42	2	6	15.6159	3.96675	1.33841	31.34	21.4	5309.13	44.9673	48.4841	176.452	71.0204	103.334	8.42092	1056.9	21.44	67	0	0	0	0	84.6584	10.0192	22.675	84.0125	143.543	108.369	65.5	12.5	0	32.575	14	20	12.75	0	0	105	0	0	0	40	0	0	0	5.69	0	53.25	0	Female
43	1	7	14.5656	3.801	2.10729	35.15	20.46	8009.8	76.091	69.9654	250.681	102.439	143.848	10.1419	1366.66	27.5	0	7.1875	24.0667	0	25.5	91	5.1875	77.6458	249.5	0	57	87.5	11.6917	0	63.75	38.125	0	0	0	58.7	0	55.25	0	11	80	0	6.25	1.56875	3.965	0	0	0	Male
44	1	6	14.9584	3.988	1.92759	28.36	29.84	7687.21	58.926	57.5508	282.446	143.369	135.539	9.88796	1493.56	51.5025	8.95	12.0375	27.375	80	0	22.5	17.6625	97.6084	42.0341	41	55.95	110	0	0	28.2	32	0	0	19.6875	98.75	113	108.75	0	0	40	117.683	6.25	0	5.6925	0	25	0	Male
45	2	7	15.9524	4.2685	1.32601	25.26	31.56	5660.06	38.637	46.3142	215.358	111.634	100.85	7.8043	1190.91	0	7	0	23.7563	24.25	50	42.625	11.7708	54.25	21.5	71.5	38.6208	0	5.9375	24.25	43.125	55.75	22.5	12.5	22.6875	0	64.5	130	0	0	160	0	12.1666	0	0	0	0	0	Female
46	1	7	13.4611	3.75	1.71216	31.76	26.48	6420.62	55.1116	48.4657	221.889	106.28	112.867	8.29237	1173.75	42.5	33.5	7.1875	27.2	0	0	68.25	12.25	21.875	67.1875	37.4167	30	58.3334	10.2625	0	10.25	56.75	20	0	19	117.4	108.643	0	0	0	40	39.2275	18.75	0	6.2525	0	0	0	Male
47	1	7	15.8125	4.294	1.81615	31.86	34.18	7798.53	67.144	60.719	267.465	166.601	99.7965	13.0605	1310.72	36.75	0	7.5	7.5	23.3125	0	24.0833	27.8125	95.2083	98	105.083	36	0	11.6917	0	25.25	53.75	20	25	19	0	54.3214	0	0	3.90625	160	0	6.25	0	0	0	25.25	0	Male
48	2		14.859			33.91	29.52	5413.83	49.6204	39.1541	182.141	99.9006	81.5173	10.6201	1028.76	0	54.5	0	0	24.25	0	65	22.5625	48.8838	12.75	0	38.875	0	11.875	0	12	35.0625	22.5	0	0	0	258	0	0	0	160	0	0	0	2.16	0	21.5	0	Female
49	2	7	17.2517	4.1835	1.37451	33	31.48	5750.26	51.2847	44.9743	192.314	113.152	79.0124	9.23031	1122.95	35.8875	0	7.08437	21.75	24.25	25	57.625	5.39582	19.4613	125.75	0	20	28.1845	0	37.5	26.75	20.5	22.5	0	0	94.5	0	65	0	0	120	0	6.08332	0	2.16	0	77.75	0	Female
50	1	7	15.909	4.2175	1.45557	34.81	30.08	6138.85	57.7501	47.5621	199.764	115.401	84.3334	6.33954	832.623	55	8.83333	0	22.5	0	0	22.75	22.625	59.7917	22.25	0	10	0	0	37.5	14	68	20	0	0	58.7	0	0	0	0	0	39.2275	12.5	0	8.54	0	0	0	Male
51	1		15.0432			31.63	31.82	5543.22	47.3818	43.5635	191.593	110.244	78.2935	8.63817	968.536	51.2525	75.95	0	0	0	0	24.6875	29.775	55.4584	0	106.5	17.35	27.5	5.62967	0	0	0	20	0	19.6875	49.375	35	0	0	0	80	39.2275	12.5	2.5	4.5225	0	19.75	0	Male
52	2	7	13.9391	3.85625	1.65658	32.35	28.26	6388.18	55.857	39.2819	228.526	112.844	113.724	5.76745	992.388	47.85	0	8.58333	16.6313	24.25	50	0	18.1458	49.2113	43	78.4	0	28.1845	0	0	37	33.125	0	0	45.375	94.5	129	195	0	0	0	0	24.3333	0	7.57	0	0	0	Female
53	2	7	14.9008	3.84775	1.47329	29.89	26.72	5668.87	45.7984	44.7983	199.893	94.6706	104.459	7.15389	1324.74	45.6375	7	0	19.125	24.25	0	22.375	11.7708	33.7113	90.5	74.2	44.3708	56.369	11.875	0	34	14	0	0	22.6875	94.5	263.5	65	0	0	160	0	12.1666	0	5.6775	7.5	0	0	Female
54	1	7	20.0433	5.161	1.0688	24.97	33.99	5516.09	37.2224	43.301	212.827	117.165	94.2994	10.6189	1120.88	41.25	35.3333	7.5	9.06668	0	0	69.5833	12.25	47.6667	71.5	121	68	58.3334	0	0	24.25	15.25	0	0	0	117.4	0	55.25	102.5	0	0	0	12.5	3.1375	3.965	0	32.5	0	Male
55	1	7	18.9645	4.362	1.38403	34.47	28.8	6037.13	56.2497	52.267	191.922	108.67	82.0902	8.55058	1142	55.67	0	12.0375	0	20	24.5625	22.5	17.6625	13.0209	97.1364	0	11.6875	110	0	0	46.25	60.0541	60	0	0	148.125	0	54.375	0	0	80	0	12.5	0	1.8975	0	21.5	0	Male
56	1	7	14.7743	3.8945	1.97856	33.54	30.24	7705.49	69.8436	57.2511	258.797	145.652	112.932	10.1898	1421.11	48.75	8.83333	7.5	17.7625	0	0	45.5	21.6875	97.2917	80.5	128.167	29.5	0	11.6917	0	39	30	3.25	0	0	234.8	0	0	0	13.0625	80	0	6.25	3.1375	7.93	0	20.25	0	Male
57	2	7	16.2584	4.43	1.4207	32.72	24.38	6293.69	55.6643	45.6657	216.397	95.9084	117.603	10.9983	1132.67	11.9625	14	0	8.31563	24.25	0	22.375	0	102.884	67.5	0	64.9208	56.369	11.875	0	10.25	0	45	12.5	22.6875	47.25	193.5	65	45.5625	1.78125	40	0	12.1666	0	6.48	0	0	0	Female
58	2	7	14.9687	3.6735	1.5989	25.83	31.03	5873.55	41.0054	41.4605	228.401	113.923	112.603	11.4471	1301.43	39.2125	33.5	0	16.6313	0	0	67.125	10.7916	45.5	241.5	0	70.4125	56.369	11.875	0	6.25	0	22.5	0	22.6875	141.75	129	0	0	1.78125	120	0	12.3333	0	0	0	40.5	0	Female
59	2	7	17.8134	4.7275	1.50147	25.99	28.26	7098.19	49.8584	51.69	273.687	125.38	145.523	12.8998	1599.77	35.8875	0	0	29.7563	24.25	0	67.125	39.7291	34.9613	197.25	156.8	128.021	56.369	11.875	0	23.625	41.3125	22.5	12.5	22.6875	94.5	193.5	0	0	0	160	0	6.08332	0	3.785	0	32.5	0	Female
60	2	7	14.8452	3.91575	1.54578	21.87	27.54	6052.9	35.7825	38.4478	254.816	104.175	145.901	9.74366	1206.49	23.925	7	0	24.1313	0	25	0	22.5625	44.25	311.25	117.6	12.9708	84.5536	0	0	15.75	10	0	0	0	0	129	0	45.5625	5.34375	80	0	6.08332	0	0	0	0	0	Female
61	1	7	16.4017	4.362	1.52534	33.63	28.26	6653.52	60.4823	60.399	211.8	117.515	92.5695	10.8752	1406.17	46.5	0	0	15	46.625	0	45.5	5.1875	82.0417	49.25	95.5	92.5	58.3334	5.84583	26.75	37.375	45.5	0	12.5	0	176.1	0	0	51.25	0	120	0	6.25	1.56875	8.54	7.5	0	0	Male
62	1	7	14.0759	3.733	2.15822	31.83	26.03	8056.64	69.309	73.3246	265.551	131.092	131.331	13.897	1705.73	64.5	26.5	7.1875	8.88125	0	25.5	22.75	6.125	35.3958	191.75	0	96.25	58.3334	17.5375	0	58.5	74.25	0	0	0	176.1	108.643	110.5	102.5	0	40	0	6.25	3.1375	5.9475	0	0	0	Male
63	1	7	14.2813	4.039	1.70129	32.99	28.91	6871.53	61.2727	61.717	222.515	124.178	97.8233	11.8466	1460.35	41.25	26.5	7.5	8.88125	23.3125	0	68.25	15.5625	35.8958	83.75	112.25	50	87.5	5.84583	0	48.875	72	0	0	0	234.8	0	0	51.25	0	120	0	0	0	4.27	8.25	19.75	0	Male
64	2	7	17.5112	4.0985	1.32668	28.79	25.18	5437.41	42.3114	53.0507	185.745	85.5763	99.7534	7.00545	1035.02	35.425	33.5	0	20.3156	24.25	0	22.375	10.7916	27.4613	135.5	35.75	41.6208	84.5536	7.5	24.25	42.5	17.5625	0	0	0	47.25	64.5	0	0	4.75	0	0	6.08332	0	2.16	7.5	50	0	Female
65	2	7	12.4647	3.512	2.07263	34.52	31.03	7279.07	67.9144	53.2352	241.54	141.151	98.3182	9.64777	1394.1	35.8875	0	7.08437	8.31563	0	0	85.25	10.7916	68.4613	65.75	39.2	70.0667	0	17.8125	0	16	75.75	0	0	22.6875	189	134.5	130	45.5625	0	160	0	12.1666	0	1.8925	0	26	0.0025	Female
66	2	7	15.2973	3.8435	1.75351	31.84	24.24	6739.63	58.0002	55.6368	227.937	102.093	124.226	9.75469	1230.59	35.8875	0	0	24.9469	48.5	0	20.25	29.9166	37	170.25	264.05	30.25	56.369	5.9375	0	59.75	25.3125	0	0	0	0	64.5	0	0	0	40	0	24.3333	0	8.64	0	19.5	0	Female
67	1	7	17.8038	4.447	1.28922	26.36	34.56	5733.18	40.8474	49.4289	211.193	123.823	87.0203	12.4369	1125.06	13.75	35.3333	0	0	23.3125	25.5	22.75	5.1875	36.75	108	0	24	58.3334	0	0	0	40.75	0	0	38	0	0	110.5	51.25	0	0	0	0	0	2.135	0	36.5	0	Male
68	1	7	16.2854	4.158	1.38423	32.18	23.54	5755.64	50.0547	51.596	189.333	84.6752	103.894	9.69652	1283.52	41.25	0	22.1875	8.88125	0	0	45.5	0	70.25	237.25	60.5	91	58.3334	27.8	0	40.875	10.5	20	12.5	0	58.7	0	0	0	0	160	0	12.5	0	4.1175	0	0	0	Male
69	1	7	20.4917	4.634	1.25978	32.65	28.68	5837.84	51.5152	45.5856	197.394	104.628	89.9433	8.645	1142.04	27.5	0	0	17.7625	23.3125	0	45.5	22.625	37.375	54	121	32	58.3334	27.8	0	27.5	30.25	0	0	19	0	54.3214	0	0	0	160	39.2275	12.5	0	8.54	0	0	0	Male
70	1	7	15.5511	4.06875	1.54818	35.23	23.17	6299.17	59.9709	46.9091	205.372	91.2223	112.826	5.9996	920.789	55	0	14.375	0	0	0	45.5	15.5625	56.7708	119.25	60.5	0	58.3334	20.525	0	0	49.125	0	0	0	0	0	55.25	0	11	40	0	6.25	0	5.9475	14.25	0	0	Male
71	2	7	15.6885	3.71175	1.43636	35.79	34.45	5331.39	51.5685	36.1463	177.025	114.799	61.466	9.04503	1000.27	47.85	0	0	0	48.5	25	0	5.39582	23	116.5	35.75	20	0	0	0	0	58.1875	22.5	0	22.6875	0	0	130	0	0	80	156.91	18.25	0	7.57	0	0	0	Female
72	1	7	20.5061	5.212	1.13536	26.19	29.51	5917.49	41.884	48.529	221.563	109.132	110.819	8.20492	1290.9	55	17.6667	0	0	46.625	0	68.25	12.25	94.0208	0	149.667	27.5	29.1667	0	0	66.25	26.5	0	0	0	58.7	252.286	110.5	0	0	80	0	0	0	4.27	0	21.5	0	Male
73	2	7	15.843	3.8435	1.63084	30.13	25.64	6268.13	51.0412	53.167	217.4	100.448	115.616	7.8387	1333.9	47.85	14	8.58333	7.5	24.25	0	22.375	29.9166	36.75	62	144.2	67.025	112.738	0	0	33.875	38.625	0	0	0	94.5	64.5	65	0	0	160	0	12.1666	2.57145	2.16	0	41	0	Female
74	2	7	13.4518	3.6905	1.56393	25.61	23.19	5771.67	39.9456	28.6251	237.354	83.6412	150.393	8.88189	891.468	9.75	0	0	0	0	25	59.75	10.7916	45.9225	122.5	0	30.65	0	0	0	10.25	11.3125	0	0	22.6875	0	258	0	0	0	40	0	18.25	0	0	33	0	0	Female
75	1	7	20.7946	4.9995	1.70432	27.82	28.14	8520.75	64.0694	70.7822	309.506	149.875	158.636	15.0875	1705.09	41.25	0	0	27.2	0	0	45.5	18.375	58.2708	297	67.6667	54.75	116.667	5.84583	0	27.75	0	0	25	19	234.8	0	0	0	7.8125	80	0	18.75	0	4.27	16.5	39	0	Male
76	2	7	14.0103	3.495	2.02349	26.76	26.42	7072.11	51.158	51.1035	269.348	116.784	148.148	7.36065	1472.57	47.85	0	0	33.2625	48.5	0	42.625	35.3125	107.423	117.75	0	0	84.5536	0	0	63.75	14	0	0	0	141.75	64.5	195	45.5625	0	0	117.683	12.1666	0	0	0	0	0	Female
77	1	7	15.1128	4.005	1.49062	31.97	22.6	5969.92	51.5792	47.4866	203.506	84.3186	117.547	14.36	1575.89	13.75	0	22.5	0	0	0	22.75	11.3125	21.375	217.062	165.583	224.25	58.3334	5.84583	0	19.75	0	3.25	0	0	58.7	108.643	0	51.25	0	160	0	6.25	0	6.405	0	22.5	0	Male
78	2	7	16.857	3.9115	1.68244	35.52	32.96	6580.87	63.1828	51.5278	210.61	135.573	71.6435	10.6934	1040.58	35.8875	21	0	7.125	72.75	0	22.375	22.5625	61	44	0	43.625	56.369	17.8125	0	23.625	33.125	22.5	0	22.6875	141.75	0	0	0	0	80	39.2275	6.08332	0	6.48	0	46.5	0	Female
79	1	7	15.3282	4.09	1.4134	34.21	27.92	5780.79	53.4465	57.9031	176.247	100.866	74.8276	9.67504	1021.67	48.5	0	0	0	0	0	45.5	10.375	27.2708	103.125	0	34.75	116.667	23.3833	0	20.875	42	20	0	19	0	0	0	102.5	2.5	120	120.228	0	0	10.5225	0	0	0	Male
80	2	7	16.7084	4.073	1.82189	35.76	28.33	7420.57	71.7257	56.0601	238.54	131.389	106.08	10.9143	1119.86	47.85	0	0	8.31563	0	25	44.75	17.1666	75.845	97	0	85.0958	28.1845	23.75	24.25	58.25	11.3125	22.5	12.5	0	0	193.5	130	0	0	40	0	18.25	0	8.64	0	19.5	0	Female
81	1	7	15.4305	4.192	1.38435	34.36	24.5	5803.18	53.899	41.2451	193.267	88.8766	101.285	6.60361	1158.9	55	0	7.1875	24.0667	0	0	45.5	17.4375	60.125	39.75	105.083	62.75	58.3334	0	0	23.75	55.5	0	0	19	176.1	0	0	0	0	120	78.455	12.5	1.56875	8.54	7.5	0	0	Male
82	2	7	18.115	4.923	1.09591	25.32	30.29	5395.18	36.9164	45.0736	203.81	102.137	90.9826	9.14585	1217.16	35.8875	14	7.08437	7.5	24.25	0	20.25	21.5833	40.9613	79.5	78.4	46.75	84.5536	0	0	15.75	14	22.5	0	22.6875	141.75	0	65	0	0	120	39.2275	12.1666	3.85717	4.32	0	26	0	Female
83	1	7	15.4795	4.209	1.57041	27.39	29.5	6609.87	48.9308	51.1976	245.771	121.882	123.126	10.1049	1337.92	27.5	17.6667	7.5	8.88125	46.625	0	24.0833	10.375	62	170.5	149.667	39.25	87.5	17.5375	0	17.125	15.25	0	0	19	0	108.643	55.25	0	0	80	0	0	4.70625	3.965	0	0	0	Male
84	2	7	15.2055	4.2005	1.73467	32.84	21.2	7286.47	64.6766	67.3225	234.413	96.5375	137.437	8.3225	1474.26	42.3875	134	0	0	0	0	42.625	10.7916	49.6338	108.75	153.35	88.8708	84.5536	23.75	0	56.625	0	0	0	0	0	129	0	0	0	160	39.2275	18.25	0	3.785	0	49.5	0.01	Female
85	2	7	15.9731	4.2005	1.38447	33.53	26.56	5815.48	52.7028	59.5812	178.427	96.5353	81.1272	7.80345	1275.22	47.85	7	0	0	24.25	0	62.875	6.375	80.7113	44.5	0	57.775	56.369	5.9375	0	57.375	58	22.5	25	0	189	64.5	65	0	0	80	27	6.08332	0	8.105	0	36.5	0	Female
86	2	7	17.1363	4.056	1.6207	19.35	31.01	6573.56	34.3757	50.7729	277.597	127.41	148.207	12.2579	940.257	35.8875	21	29.8365	0	24.25	0	44.75	16.1875	22.5	98.75	156.8	81.7708	28.1845	0	0	36.25	11.3125	45	0	0	0	64.5	0	0	0	0	0	6.08332	0	5.6775	0	15	0	Female
87	2	7	16.3082	4.26	1.72153	29.03	28.42	7333.72	57.5332	50.746	271.225	130.242	138.839	13.1854	1134.4	47.85	14	0	8.31563	24.25	50	22.375	10.7916	42.2113	171.125	156.8	32.5958	56.369	0	0	17.875	54.3125	45	0	45.375	0	0	65	0	0	0	0	18.25	2.57145	7.57	0	22.5	0	Female
88	2	7	15.141	3.988	1.71216	23.25	30.52	6828.08	42.911	48.0281	276.533	130.234	143.247	6.76445	876.597	47.85	0	17.1667	8.31563	0	25	0	24.5208	37.25	53	0	0	28.1845	0	0	55.375	46.8125	22.5	0	0	0	293	0	0	0	0	0	6.08332	0	1.8925	0	0	0	Female
89	1	7	15.6803	4.056	1.81526	30.15	33.02	7362.69	60.0056	66.2538	251.068	151.937	97.0847	14.6579	1430.71	70.75	0	0	0	0	0	45.5	5.1875	71.2917	168.25	149.667	112.5	0	11.6917	0	66.625	44	0	12.5	19	176.1	0	0	0	0	160	0	6.25	0	5.9475	22.5	19.75	0	Male
90	1	7	15.2895	3.988	1.58146	27.93	29.28	6306.85	47.6044	54.9927	225.468	115.425	109.486	14.4773	1312.63	13.75	0	0	7.5	46.625	0	68.25	16.5	32.4167	181	37.4167	67	87.5	0	26.75	24.25	49.125	40	0	0	176.1	0	0	51.25	3.90625	40	0	12.5	0	6.2525	0	0	0	Male
91	1	7	15.9239	4.08575	1.20093	29.9	27.5	4906.72	39.6548	41.0881	171.576	84.3469	86.3822	9.22658	1044.05	0	0	0	0	0	0	92.3333	6.125	24.5417	101.75	121	134	29.1667	5.84583	0	9.5	15	0	25	38	0	0	55.25	0	0	40	0	0	0	0	0	22.5	0	Male
92	2	7	17.2885	3.93275	1.37687	38.69	24.87	5414.89	56.6275	54.9102	148.186	84.1623	62.0903	9.40037	902.877	57.6	0	0	0	0	25	0	0	18.9613	78.25	35.75	124.646	0	17.8125	24.25	43.125	70.5625	0	12.5	22.6875	0	64.5	0	0	0	120	0	0	0	10.5325	16.5	0	0	Female
93	2	7	18.1656	4.549	1.43039	21.49	30.66	6506.84	37.7843	41.0807	275.026	124.667	147.488	9.19796	1079.51	67.1	0	8.58333	0	24.25	0	22.375	0	93.4613	66.75	0	13.4125	0	5.9375	0	32.25	38	0	0	0	0	258	65	0	0	120	0	0	0	7.57	12	0	0	Female
94	2	7	16.4222	4.2685	1.39007	28.03	34.03	5933.52	44.9475	42.5459	221.635	126.206	91.9375	11.8411	1329.42	47.85	14	7.08437	0	24.25	50	85.25	5.39582	46	65.5	78.4	66.65	0	0	0	26.75	54.3125	45	0	22.6875	0	129	130	0	0	80	156.91	6.08332	2.57145	7.57	0	0	0	Female
95	2	7	15.918	4.09	1.37065	27.03	29.01	5605.97	40.9523	62.2226	189.834	101.642	87.3969	12.8575	1389.25	35.8875	0	14.1687	0	0	0	67.125	5.39582	0	222.625	39.2	112.546	28.1845	5.9375	0	60.625	0	22.5	12.5	22.6875	141.75	0	0	0	0	160	39.2275	0	0	6.2125	6	0	0	Female
96	1	6	15.8978	3.8435	1.64349	34.92	30.38	6316.77	59.6109	52.8038	199.358	119.934	78.8164	9.03583	979.926	65.42	0	0	22.5	0	24.5625	22.5	0	13.475	41.7841	0	19.9375	0	5.62967	0	27.325	45.8666	40	14.25	39.375	49.375	113	108.75	0	3.47915	40	0	18.75	0	6.42	0	0	0	Male
97	2	7	15.7096	4.158	1.50953	34.49	29.94	6276.64	58.5004	55.9996	197.679	117.446	78.1935	8.67686	1276.53	47.85	7	8.58333	0	48.5	25	85.25	12.75	42.7113	73.6125	0	66.625	84.5536	0	0	20.5	73.3125	0	37.5	22.6875	189	64.5	65	0	0	80	0	0	0	8.64	0	0	0	Female
98	2	7	17.8094	4.3195	1.57852	27.31	28.07	6818.4	50.3262	50.8118	255.955	119.622	134.896	11.2603	1330.61	35.8875	0	0	33.2625	72.75	0	20.25	0	99.25	181	117.6	0	84.5536	5.9375	0	15.75	56.3125	90	0	22.6875	94.5	64.5	0	0	14.25	0	0	6.08332	0	5.945	0	0	0	Female
99	1	7	18.305	4.68075	1.40322	27.69	25.14	6568.14	49.1502	56.451	236.635	103.216	132.063	13.5884	1471.87	0	0	14.375	8.88125	0	0	46.8333	15.5625	90.3958	147.75	149.667	151.5	116.667	5.84583	0	57.75	26.5	40	25	0	176.1	54.3214	0	0	0	80	0	12.5	0	4.27	0	19.5	0	Male
100	2	7	14.8385	3.988	1.1129	24.44	34.41	4438.26	29.3203	43.0982	164.764	95.451	65.2548	10.341	1172.44	46	7	17.1667	7.125	24.25	0	42.625	0	46.5	169.375	35.75	107.687	0	0	0	33.875	0	12.5	37.5	0	0	0	0	91.125	0	160	0	6.08332	0	0	0	42	0.01	Female
101	2	6	16.1601	4.43	1.56103	32.49	21.22	6915.37	60.7329	40.8176	248.172	91.7201	155.282	10.8127	1311.66	32.16	10.475	0	6.5	0	0	22.5	10.0192	78.6708	75.475	442.75	71.5354	21.8333	16.9167	30	0	0	8.45	0	0	0	0	0	0	0	80	0	12.5	0	7.46	0	31.25	0	Female
102	2	7	15.5666	3.835	1.43011	34.72	21.14	5484.47	51.4584	37.2241	184.472	72.4541	107.575	5.34158	867.895	45.3875	0	0	0	0	25	44.75	24.5208	88.2113	12.75	35.75	19.625	28.1845	11.875	0	25.75	54.0625	0	12.5	0	0	129	65	91.125	0	80	0	6.08332	0	5.945	0	0	0	Female
103	1	7	15.2622	4.073	2.06763	31.06	25.69	8421.44	70.7013	75.3919	282.745	135.227	145.58	11.4186	1497.35	41.25	17.6667	0	9.06668	23.3125	0	68.25	11.3125	227.396	54	0	36.75	87.5	0	0	51.75	15.25	20	0	19	234.8	0	0	51.25	0	120	0	25	3.1375	5.9475	0	30	0	Male
104	2	7	17.0612	4.42575	1.38031	33.15	30.36	6108.93	54.737	47.1503	205.365	115.911	86.4824	8.84456	1063.5	47.85	0	0	14.25	24.25	25	65	5.39582	132.711	65.5	78.4	49.8	0	0	0	23.625	49.125	0	0	22.6875	47.25	0	0	0	0	120	0	6.08332	2.57145	5.6775	0	0	0	Female
105	2	7	21.1496	5.00375	1.05589	31.43	28.27	5283.43	44.8752	39.6855	183.866	93.3663	89.072	9.49785	1248	23.2125	7	8.58333	0	0	25	65	5.39582	39.7113	157.375	39.2	45.75	56.369	0	24.25	12	25.5	22.5	12.5	22.6875	141.75	64.5	65	0	4.75	80	0	0	0	3.785	7.5	54	0	Female
106	2	7	17.4541	4.243	1.62758	37.4	24.5	6905.82	69.8065	58.8841	207.82	105.731	99.5622	10.3701	1152.5	27.7125	7	0	0	24.25	0	22.375	17.1666	57.3838	179.75	0	22.75	56.369	17.8125	0	21.25	58.125	45	0	22.6875	189	0	0	0	1.78125	80	0	12.1666	0	7.57	0	47.5	0	Female
107	2	7	17.546	4.4385	1.53512	30.79	26.44	6813.62	56.7061	54.0731	237.598	112.597	123.131	10.1844	1325.22	35.8875	19.5	0	0	0	0	89.5	23.5416	95.595	137.25	117.6	58.425	28.1845	5.9375	24.25	51.125	25.3125	0	0	22.6875	189	64.5	0	45.5625	0	40	0	6.08332	0	8.105	0	0	0	Female
108	2	7	16.1674	4.107	1.46863	37.63	27.56	6031.65	61.3383	41.2891	191.501	103.879	86.1692	8.53837	1057.02	23.925	0	8.58333	0	24.25	0	107.625	21.5833	79.6338	79.5	0	101.05	0	15.625	0	31.5	48.625	0	0	22.6875	0	0	195	0	0	160	0	12.1666	1.28572	6.48	0	21.5	0	Female
109	1	6	15.5201	3.8435	1.73176	34.97	25.64	6656	62.9023	44.2276	223.084	106.676	114.029	9.59906	1085.38	23.6675	35.8	0	0	0	24.5625	22.5	13.125	130.888	19.25	53.25	17.35	27.5	5.62967	0	15.325	30.1875	0	0	19.6875	0	113	0	100.5	3.47915	0	0	6.25	0	2.625	0	21.5	0	Male
110	2	7	15.2303	3.7585	1.56322	34.18	29	5875.38	54.28	43.655	195.415	106.497	85.8862	11.0655	1090.76	47.85	14	0	0	24.25	0	20.25	23.5416	49.4613	205.75	39.2	80.2583	0	5.9375	0	56.75	44.25	0	0	0	47.25	64.5	0	0	0	160	0	18.25	2.57145	8.64	0	0	0	Female
111	1	7	17.5	4.3535	1.56656	29.42	29.65	6820	54.2306	57.9789	239.449	126.397	112.706	16.9144	1558.61	32.75	26.5	0	0	0	0	69.5833	11.3125	12.2708	266.625	179.917	88.5	29.1667	5.84583	0	20.875	52	0	12.5	19	176.1	0	0	0	3.90625	120	0	18.75	0	8.54	6	26	0	Male
112	2	7	15.7571	4.08575	1.62689	34.2	30.56	6647.09	61.4399	53.649	215.272	126.955	87.9814	9.27816	1083.86	57.6	7	8.58333	0	0	25	44.75	35.3125	50.3838	69.9375	0	41.8417	28.1845	15.625	48.5	37.75	67.0625	22.5	0	0	189	0	0	91.125	0	40	0	0	0	2.16	7.5	0	0	Female
113	2	7	15.1969	4.07725	1.32958	31.94	23.5	5421.02	46.8014	31.1783	197.066	79.6343	112.829	4.79312	783.806	35.8875	0	0	7.5	0	0	22.375	6.375	119.461	0	143	19.625	0	0	0	13.375	51.5625	0	0	68.0625	47.25	0	130	0	1.78125	40	0	6.08332	0	1.8925	0	0	0	Female
114	1	7	16.5976	4.41725	1.44089	28.35	35.09	6364.77	48.7629	55.2224	225.228	139.587	84.4428	8.08703	1091.43	55	0	0	26.6438	23.3125	0	22.75	0	57.7708	54.25	74.8334	9.75	87.5	5.84583	0	51.3312	44.25	20	0	0	0	54.3214	0	153.75	0	40	39.2275	18.75	0	3.965	7.5	31.25	0	Male
115	2	7	18.7258	4.906	1.2216	25.36	21.62	5993.17	41.0762	43.6557	233.278	80.9892	150.454	10.0375	1438.75	23.925	0	0	24.9469	0	25	62.875	24.5208	74.9613	212.5	0	60.175	112.738	0	0	45.625	25.3125	0	0	0	47.25	129	130	182.25	0	40	0	12.1666	0	4.0525	0	0	0	Female
116	2	7	16.4399	4.362	2.14929	36.02	23.61	9375.2	91.2771	59.8703	310.531	138.318	167.136	12.0372	1552.11	57.6	7	0	7.5	0	25	109.75	29.9166	145.884	173.875	117.6	39.15	28.1845	23.75	0	18.125	54.75	0	0	0	141.75	64.5	65	0	4.75	80	0	24.3333	0	9.73	0	0	0	Female
117	2	7	16.6289	4.277	1.17702	32.1	31.68	5034.12	43.6783	36.1155	174.762	99.6676	75.0567	7.35464	922.104	45.6375	0	0	14.25	24.25	25	44.75	27.9583	38.9225	74.5	39.2	36.75	28.1845	5.9375	0	42.5	15	22.5	12.5	0	47.25	64.5	65	45.5625	0	40	0	12.1666	0	5.6775	0	0	0	Female
118	2	7	14.5618	3.9285	1.71971	39.48	24.14	6755.89	72.0919	54.1411	198.268	101.938	94.073	10.7025	1348.88	23.925	21	0	0	0	25	44.75	35.3125	59.1725	143.5	78.4	83.8708	0	5.9375	0	44.875	35.0625	0	12.5	45.375	0	64.5	0	136.688	1.78125	120	0	12.1666	0	4.32	0	0	0	Female
119	2	7	17.9564	4.4045	1.71231	36.01	29.67	7541.85	73.4096	59.4582	238.651	139.832	95.3397	6.67365	1146.6	47.85	0	0	8.31563	48.5	25	0	36.2916	75.1725	0	78.4	0	84.5536	25.3125	0	55.25	25.3125	0	12.5	45.375	189	64.5	0	45.5625	0	160	0	18.25	0	9.73	0	0	0	Female
120	1	7	17.5286	4.209	1.57547	36.99	24.83	6631.14	66.2945	54.8165	203.022	102.926	97.2891	8.80657	1089.68	55	0	0	0	0	25.5	45.5	23.5625	66.8958	107.25	149.667	41.5	29.1667	11.6917	0	62.5	37.5	0	25	0	0	0	0	0	0	160	0	0	0	7.93	0	0	0	Male
121	2	7	17.6561	4.243	1.53866	28.89	26.01	6528.55	50.9709	35.6758	252.533	106.139	142.044	9.41566	1402.28	47.85	0	0	0	0	50	44.75	28.9375	42.4613	174	0	39.25	0	0	0	23.625	11.3125	0	0	68.0625	141.75	193.5	260	0	0	80	0	18.25	0	6.2125	0	0	0	Female
122	2	7	16.8152	4.277	1.45226	27.11	27.92	6211.33	45.5101	55.0613	224.315	108.379	113.339	10.1237	1240.26	47.1375	21	7.08437	8.31563	48.5	0	0	11.7708	73.75	96	149.9	115.812	84.5536	0	0	31.5	14	0	0	22.6875	0	0	0	0	1.78125	160	0	12.1666	1.28572	6.48	0	0	0	Female
123	2	7	13.2739	3.89025	1.58843	33.5	30.58	6179.41	55.9451	45.7133	205.472	118.122	78.175	10.7784	1371.78	47.3875	6.25	0	0	48.5	0	22.375	23.5416	38.25	145.25	39.2	74.6625	0	0	0	0	107	22.5	0	22.6875	141.75	0	65	45.5625	0	80	117.683	0	0	10.265	0	0	0.02	Female
124	2	7	15.608	4.00925	1.66117	32.41	26	6660.04	58.3426	52.8298	225.015	108.244	116.539	8.21036	972.071	35.8875	0	7.08437	22.125	24.25	0	44.75	24.5208	29.75	60.75	35.75	0	112.738	5.9375	0	50.375	26	0	0	0	189	0	0	0	3.5625	40	0	24.3333	1.28572	7.8375	0	0	0	Female
125	2	7	16.5538	4.2175	1.33001	35.2	26.95	5609.3	53.3622	49.3609	174.776	94.4925	78.6169	6.38851	1118.29	35.8875	0	17.1667	0	48.5	0	0	6.375	62.4613	87	0	35.9417	84.5536	11.875	0	39.375	31	22.5	12.5	0	47.25	0	130	0	0	120	78.455	6.08332	0	6.2125	0	41.75	0	Female
126	2	7	14.5978	3.733	1.25084	35.02	24.35	4669.37	44.1984	32.8901	153.181	71.062	79.6921	6.2846	996.151	0	0	0	29.625	0	0	44.75	10.7916	63.4613	66.75	149.9	36	28.1845	5.9375	0	23.375	0	0	0	45.375	141.75	0	0	0	1.78125	80	39.2275	12.1666	0	6.2125	0	31.25	0	Female
127	2	7	16.1199	4.379	1.09385	29.28	21.43	4789.95	37.9027	44.898	163.697	64.1501	98.0751	6.97891	1168.72	11.9625	0	7.08437	8.31563	24.25	0	44.75	5.39582	57	144.938	74.95	102.9	84.5536	11.875	0	65.375	40.5625	0	0	0	141.75	0	0	0	9.5	80	0	0	0	0	0	0	0	Female
128	2	7	20.076	4.85075	1.32494	37.13	24.64	6426.93	64.5027	49.0394	199.888	98.9945	100.403	5.0673	953.959	45.6375	0	0	0	0	25	0	6.375	53.1725	63.9375	78.4	0	56.369	11.875	0	16.5	52.8125	0	0	22.6875	141.75	64.5	0	45.5625	5.34375	0	0	0	0	5.6775	0	21.5	0	Female
129	2	7	14.9833	4.00075	1.51162	35.52	31.63	6047.62	58.0564	46.0114	194.893	119.544	74.4581	9.5259	1058.96	47.85	0	7.08437	0	24.25	50	65	28.9375	39.25	88.75	0	49.7208	28.1845	0	0	13.375	71.6875	22.5	0	22.6875	47.25	0	65	0	0	120	78.455	12.1666	1.28572	9.9975	0	48.5	0	Female
130	2	6	15.2468	3.801	1.82712	34.8	23.17	6944.88	65.3281	48.6004	231.505	100.586	130.228	7.31246	1272.37	32.16	0	0	0	23.25	0	22.5	43.6106	73.8333	154.925	0	47.7063	21.8333	15.0834	30	34.8562	13.3125	0	25.5	21.625	158.625	105	52.8438	0	0	80	0	6.25	1.25	3.92	0	21.5	0	Female
131	2	7	15.2344	4.0305	1.24567	27.63	25.86	5020.67	37.4883	40.3014	184.522	81.1483	101.39	7.05639	1107.41	11.9625	7	0	0	24.25	0	22.375	6.375	83.845	128.612	78.4	6.47083	0	5.9375	0	33.875	3.75	0	0	68.0625	141.75	129	65	0	1.78125	120	0	6.08332	1.28572	3.785	0	0	0	Female
132	1	7	15.6695	4.277	1.38667	30.57	33.81	5930.78	48.9978	42.788	211.833	125.318	85.6865	9.97299	1221.43	66.5	17.6667	0	7.5	23.3125	0	0	22.625	47	92.25	37.4167	20	87.5	0	0	0	48.875	40	0	0	234.8	0	0	0	0	80	156.91	18.75	0	10.5225	0	0	0	Male
133	2	7	20.3869	5.025	1.27485	32.18	35.09	6406.1	55.717	57.8673	210.21	140.487	68.657	9.63877	1171.7	35.8875	0	17.1667	0	48.5	0	65	29.9166	0	26.5	117.6	79.05	0	0	37.5	65.625	85	0	0	0	0	129	0	0	0	160	0	12.1666	0	8.64	0	0	0	Female
134	1	7	14.9174	3.665	1.97667	36.56	29.74	7244.49	71.5809	59.6007	224.061	134.678	90.5153	6.51673	1275.44	41.25	0	22.5	0	0	25.5	68.25	27.8125	56.2917	0	30.25	54.25	29.1667	14.6792	0	51.25	52.25	0	0	19	176.1	54.3214	55.25	0	0	160	39.2275	11.5	4.70625	6.2525	0	25	0	Male
135	2	7	14.7449	3.58	2.33572	35.34	30.39	8361.88	79.8728	56.2465	277.158	158.807	118.598	9.16744	1268.38	75.5625	0	0	22.5	24.25	25	22.375	16.1875	78.6338	55.75	156.8	37.4	84.5536	9.6875	0	37	14	0	0	0	0	64.5	0	0	0	160	0	24.3333	0	6.48	0	22.5	0	Female
136	1	7	18.9757	4.94	1.38378	27.31	31.72	6835.86	50.4603	58.3665	247.557	135.521	106.906	12.1747	1534.23	52.5	0	21.5625	0	0	0	68.25	23.5625	36.2708	103	125.75	62.5	58.3334	0	26.75	34.875	19.5	0	12.5	0	234.8	0	0	0	0	80	0	0	0	8.54	24	24.75	0	Male
137	1	7	16.3645	4.53625	1.489	28.13	28.89	6754.49	51.3506	51.8201	247.979	121.972	120.465	10.1635	1469.97	27.5	8.83333	7.1875	0	0	0	24.0833	38.1875	166.333	36	184.667	20	87.5	0	0	14	0	0	0	19	0	54.3214	55.25	0	0	120	78.455	18.75	0	8.54	24.75	52	0	Male
138	2	7	15.5118	3.99225	1.65166	29.98	23.35	6593.83	53.4359	52.2227	233.258	96.2382	134.588	12.9952	1404.2	0	0	0	30	48.5	0	44.75	23.5416	33.9613	234.5	107.25	85.175	112.738	5.9375	0	33.875	37.8125	45	0	45.375	94.5	64.5	0	0	0	160	0	18.25	0	6.2125	0	0	0	Female
139	1	7	14.8147	3.988	1.68966	28.61	28.58	6738.36	52.0955	58.6457	237.553	120.375	111.534	13.0759	1368.83	51.5025	17.9	0	7.5	60	0	22.5	16.65	79.7709	208.034	123	133.1	82.5	0	0	53.775	28.375	0	14.25	19.6875	98.75	0	108.75	0	0	40	0	6.25	0	4.5225	0	0	0	Male
140	1	7	17.7306	4.719	1.28283	26.42	29.16	6053.67	43.2336	48.9917	226.538	110.334	112.745	12.9777	1482.97	27.5	0	0	0	0	51	45.5	20.75	104.125	183	212.5	129.25	0	0	0	70.75	18.625	0	0	0	0	0	110.5	102.5	2.75	120	0	0	0	4.27	0	0	0	Male
141	2	7	15.8361	3.92	1.3448	33.24	29.52	5271.62	47.366	37.1481	179.85	97.259	78.8685	8.3441	914.534	35.8875	0	0	0	0	25	22.375	23.5416	33.9613	81.75	0	34.7458	84.5536	11.25	0	7.875	52.625	0	0	0	189	0	65	0	0	0	66.2275	18.25	0	4.0525	15	32.5	0	Female
142	2	7	15.9639	4.02625	1.64601	32.1	27.97	6627.25	57.5019	49.4933	228.77	115.836	111.109	9.77965	1287.61	0	0	17.1667	0	0	25	22.375	28.9375	56.2113	100.25	35.75	57.1208	28.1845	11.875	0	0	43.25	0	25	0	94.5	0	0	0	0	120	117.683	2.5	0	7.8375	0	0	0	Female
143	2	7	16.1603	4.26425	1.39447	28.43	28.63	5946.39	45.6932	47.9948	214.244	106.419	107.564	9.24834	1131.05	45.6375	0	7.08437	0	0	0	44.75	16.1875	37.9225	130.5	39.2	99.5333	84.5536	11.875	0	37	20	45	0	0	47.25	0	130	0	4.75	0	156.91	12.1666	0	5.6775	0	0	0	Female
144	1	7	26.732	6.113	0.978202	32.1	32.21	5979.75	51.8737	42.0683	208.4	120.379	87.6779	5.73319	1119.59	0	0	28.75	16.5667	0	0	68.25	0	47.75	39.1875	0	0	29.1667	0	0	20.25	33.625	0	0	19	234.8	0	0	51.25	5.5	80	78.455	18.75	3.1375	2.135	0	21.5	0	Male
145	2	7	17.9576	4.464	1.25046	28.08	28.33	5582.04	42.3692	30.8732	217.944	98.8293	117.564	7.7692	995.735	35.8875	33.5	0	0	0	50	44.75	24.5208	54.5	26.5	74.95	0	0	0	24.25	10.25	39.25	67.5	0	0	47.25	193.5	130	0	4.75	0	0	12.1666	0	3.785	0	21.5	0	Female
146	1	6	14.3334	3.767	1.76606	32.65	25.21	6652.75	58.6971	50.8506	225.816	104.836	120.693	9.07623	1210.83	41.7525	0	0	16.625	0	0	69.6875	12.1125	80.8667	113.868	53.25	52.375	82.5	0	49	30.5	29.1208	20	0	0	0	105	0	0	3.41668	160	0	6.25	0	10.215	0	0	0	Male
147	1	7	15.7874	4.43	1.64685	36.18	26.49	7295.53	71.3445	42.6681	245.373	120.782	123.546	9.04162	1212.12	41.25	8.83333	0	7.5	46.625	25.5	0	6.125	70.8333	106.25	121	63.5	58.3334	23.3833	0	0	15.25	0	0	19	117.4	54.3214	110.5	51.25	0	0	0	18.75	0	8.54	0	0	0	Male
148	2	7	17.8905	4.29825	1.48276	35.71	24.34	6373.27	61.5094	53.6735	198.495	96.9497	100.772	10.156	1179.21	35.8875	0	0	15	24.25	25	89.5	6.375	44.4225	243.625	78.4	68.9	28.1845	0	24.25	50.875	60.8125	22.5	25	0	0	64.5	0	0	4.75	0	0	0	0	7.8375	0	30	0	Female
149	1	7	16.6612	4.328	1.56655	34.78	21.44	6780.04	63.7404	44.9185	226.488	90.8393	134.253	7.63647	938.386	0	0	0	0	23.3125	0	0	12.25	100.687	0	0	31	0	11.6917	0	17.125	44.125	20	0	19	0	217.286	110.5	0	0	40	0	6.25	0	8.3875	30	74	0	Male
150	2	7	17.4441	4.3535	1.35778	30.97	35.5	5911.1	49.4797	52.0677	199.348	131.146	67.4914	9.85282	1037.01	47.85	0	8.58333	0	24.25	25	42.625	6.375	15	77.875	0	19.625	56.369	5.9375	0	42.5	55.5	0	12.5	0	94.5	129	0	0	0	160	0	18.25	0	7.57	0	45.5	0	Female
151	1	7	14.7946	3.784	1.81789	33.77	22.86	6878.89	62.7872	59.869	220.244	98.2903	121.398	9.69465	1376.15	9.75	67	0	16.5667	23.3125	0	70.9166	10.375	67.5625	147.75	149.667	71.5	116.667	11.6917	26.75	35.4562	26.5	0	0	0	58.7	0	0	0	0	120	0	12.5	0	1.9825	0	56	0	Male
152	1	7	13.6929	3.5205	2.25086	36.08	18.64	7924.16	77.2698	50.3816	263.14	92.3327	166.726	15.2846	1258.02	0	0	0	0	0	25.5	22.75	10.375	68.7917	304.25	149.667	86.5	58.3334	23.3833	0	0	33.875	0	0	19	0	54.3214	55.25	0	3.90625	160	0	18.75	0	7.93	0	30	0.0075	Male
153	1	7	15.3204	3.88175	1.44121	24.88	26.64	5594.43	37.6201	42.6289	217.561	93.159	117.068	9.48235	1343.5	0	0	28.75	0	23.3125	25.5	48.1666	5.1875	50.75	152.75	0	82.25	29.1667	0	0	27.75	18.625	0	12.5	19	117.4	108.643	110.5	0	0	120	0	0	0	1.9825	0	0	0	Male
154	2	7	13.4951	3.77125	1.63863	30.66	30.62	6179.69	51.2123	46.5019	218.528	118.267	98.2182	9.42264	1243.72	39.2125	14	0	23.7563	0	25	20.25	28.9375	80.8838	199.75	117.6	19.5917	0	5.9375	0	19.375	32	0	0	22.6875	47.25	0	0	45.5625	0	160	0	6.5	0	0	0	75.25	0	Female
155	2	6	15.7297	3.92	1.29021	37.43	21.71	5057.64	51.1687	45.943	148.591	68.615	79.6581	7.675	1239.01	10.72	67	0	0	0	0	81.9875	6.1875	23.375	61.6875	136.5	51.7438	21.8333	0	0	58.95	14	0	0	0	211.5	0	0	0	6.75	160	0	12.5	2.5	3.825	0	31.25	0	Female
156	1	7	17.1291	4.31525	1.16724	28.01	40.09	5036.95	38.1372	41.3877	182.332	126.195	55.303	9.16885	958.854	41.25	0	0	17.7625	46.625	25.5	46.8333	11.3125	42.7708	17.8625	149.667	69.5	0	0	0	14	66	20	0	19	0	0	0	0	0	80	0	6.25	0	2.135	0	0	0	Male
157	2	7	13.1752	3.818	1.94154	33.28	26.49	7412.8	66.6825	53.8931	253.139	122.717	128.622	15.6893	1641.39	33.675	14	0	13	0	25	87.375	22.5625	72.7113	256.875	141.5	135.771	56.369	0	0	44.875	21.5625	0	0	22.6875	141.75	0	65	45.5625	0	160	0	12.1666	0	7.57	0	0	0	Female
158	1	7	16.4548	4.5915	1.29099	42.18	26.73	5927.58	67.5746	41.2513	170.546	99.0273	71.1309	6.03096	1008.83	55	0	0	0	0	25.5	46.8333	34.875	22.875	70.75	0	0	58.3334	11.6917	0	0	70.75	0	12.5	0	176.1	0	55.25	0	0	160	0	12.5	0	12.3525	0	0	0	Male
159	1	7	19.6793	4.82525	1.32678	31.66	25.11	6402.02	54.7811	57.714	212.368	100.484	111.013	5.21896	1525.74	43.25	0	14.375	0	46.625	0	22.75	16.5	70.7708	27	252.25	0	58.3334	17.5375	26.75	66	15	0	0	19	234.8	108.643	0	0	0	160	0	18.75	3.1375	3.965	0	15.5	0	Male
160	2	7	15.9574	4.2345	1.53147	29.81	27.29	6485.03	52.2489	44.5487	236.429	110.601	122.618	9.18098	1283.89	59.1	134	0	0	0	0	22.375	0	114.673	251.875	35.75	62.5625	0	11.875	24.25	29.875	31.1125	7.5	12.5	0	0	64.5	195	0	0	160	0	0	0	8.64	0	0	0	Female
161	2	7	15.6716	4.1495	1.4559	33.94	22.54	6041.25	55.4236	43.8172	202.815	85.0872	114.556	9.99979	1466.26	23.925	0	8.58333	0	0	25	44.75	22.5625	84.25	192.125	156.8	125.604	0	11.875	0	52.75	25.3125	0	0	0	94.5	64.5	65	91.125	0	120	117.683	12.1666	0	5.6775	6	0	0	Female
162	2	7	16.5996	3.784	1.40104	24.18	43.17	5301.53	34.6392	35.2998	213.848	143.03	68.5133	11.4026	836.626	0	7	0	24.9469	0	50	0	0	26.2113	89.25	0	0	28.1845	0	0	0	42	67.5	0	0	0	0	0	0	0	160	0	24.3333	0	0	0	0	0	Female
163	1	6	14.8004	3.8265	1.74994	28.29	23.94	6696.13	51.2067	52.3083	244.073	100.196	139.399	12.2366	1465.43	23.6675	0	0	0	0	0	67.5	5.55	104.513	249.386	164	55.35	55	5.62967	49	28.2	37.5	0	0	19.6875	49.375	0	0	0	0	160	0	0	0	2.625	33	32.5	0	Male
164	2	7	14.2292	4.158	1.6905	36.31	22.9	7029.09	68.9791	68.9069	206.97	100.586	104.472	9.17921	1025.99	23.925	0	17.1667	14.25	48.5	0	65	5.39582	63.2113	145	0	73.125	84.5536	0	0	48	39.75	0	0	45.375	0	0	0	0	0	80	0	12.1666	0	4.32	0	0	0	Female
165	1	7	15.5943	4.23025	2.23889	33.48	32.98	9471.07	85.7053	69.7934	319.445	195.203	121.336	14.3894	1616.65	80.25	0	0	14	23.3125	51	70.9166	28.75	30.5	129.188	0	28.25	0	5.84583	0	74.375	41	20	0	19	176.1	162.964	110.5	102.5	0	120	39.2275	25	0	10.5225	7.5	15.25	0	Male
166	2	7	15.6512	4.3195	1.07251	32.07	29.58	4632.72	40.1493	41.1167	152.749	85.6369	66.5741	5.27668	1152.43	35.8875	0	17.1667	0	0	0	20.25	10.7916	27.4613	48	74.95	19.25	84.5536	15.625	0	21.25	0	22.5	0	22.6875	94.5	0	0	45.5625	0	160	120.228	18.25	0	5.945	0	19.5	0	Female
167	2	7	18.1623	4.634	1.03992	34.58	25.1	4819.01	45.0357	41.352	152.353	75.6092	72.3477	8.11365	868.648	35.8875	0	0	17.8875	0	0	22.375	6.375	59.25	53	0	106.521	28.1845	0	0	40.375	15	22.5	25	0	94.5	0	65	0	0	80	39.2275	12.1666	0	5.6775	0	19.5	0	Female
168	1	7	17.0921	4.0645	1.36212	35.59	30.05	5536.35	53.2485	49.5152	167.443	103.992	54.6194	7.49722	944.992	55	0	0	0	0	76.5	45.5	11.3125	15.5	29.5	74.8334	39.75	0	5.84583	0	41.125	66	0	0	19	58.7	0	55.25	51.25	2.75	0	78.455	6.25	0	8.0825	0	26	0	Male
169	2	7	19.5133	4.923	1.09565	37.61	27.04	5393.9	54.822	38.3853	169.771	91.1551	78.0574	4.9427	995.883	47.85	0	0	0	0	0	44.75	30.8958	19.4613	38.25	35.75	24.4708	56.369	15.625	24.25	7.875	40.5	0	0	22.6875	189	0	130	0	0	120	0	6.08332	0	8.64	0	0	0	Female
170	1	7	14.5484	3.96675	1.22674	29.15	34.76	4866.16	38.34	33.228	179.152	105.715	71.4092	7.95164	1095.35	13.75	8.83333	0	32.9479	23.3125	25.5	22.75	6.125	35.7708	0	0	20	29.1667	0	0	10.25	0	20	0	57	234.8	54.3214	55.25	0	0	160	0	18.75	0	2.135	8.25	19.5	0	Male
171	1	7	16.2857	4.38325	2.1398	27.44	28.59	9379.3	69.5513	64.6776	356.307	167.609	185.413	16.4824	1724.31	23.5	0	0	26.6438	23.3125	25.5	45.5	16.5	96.4375	161.438	0	56	0	17.5375	26.75	50	15.25	20	12.5	19	176.1	162.964	165.75	0	0	120	0	12.5	1.56875	0	0	21.5	0	Male
172	2	7	16.1515	4.005	2.00047	28	29.5	8011.9	60.6278	48.0902	309.584	147.719	158.754	8.29196	1260.91	47.85	0	17.1667	0	72.75	25	0	24.5208	56.6338	0	0	0	0	0	0	60.625	31	22.5	0	22.6875	47.25	258	195	91.125	1.78125	40	0	12.1666	0	6.48	0	0	0	Female
173	2	7	17.764	4.16225	1.62839	32.59	29.18	6777.76	59.7075	60.2578	221.395	123.625	97.1347	8.54892	1427.28	47.85	33.5	0	0	24.25	0	42.625	17.1666	11.4613	64.5	107.25	101.492	56.369	5.9375	0	94.375	11.3125	0	0	0	94.5	64.5	130	91.125	0	160	0	12.1666	0	7.57	0	0	0	Female
174	2	7	13.4661	3.869	1.81866	35.01	26.5	7036.4	66.5865	52.6666	229.825	116.536	112.314	10.4618	1276.47	35.8875	67	17.1667	0	24.25	0	65	28.9375	60.1725	76.5	71.5	89.825	56.369	26.875	0	35.5	0	0	37.5	0	0	269	0	0	0	40	78.455	0	5.1429	8.64	0	0	0.0075	Female
175	2	7	17.6415	4.6935	1.31568	31.86	30.1	6175.16	53.1659	38.2767	221.399	116.171	103.684	11.4761	1484.59	35.8875	0	0	22.5	0	25	67.125	28.9375	95.3838	240.375	105.75	47.775	0	5.9375	0	10.25	10	0	0	0	189	0	0	91.125	3.5625	120	39.2275	6.08332	0	5.6775	0	66.75	0	Female
176	2	7	14.6982	3.954	1.17596	27.5	29.73	4649.77	34.5652	39.533	168.345	86.3936	80.2781	6.73403	1000.11	33.425	7	0	0	48.5	0	20.25	0	7.5	70.25	0	8.25	28.1845	0	0	23.625	0	22.5	0	22.6875	189	129	0	0	0	0	0	0	1.28572	5.6775	0	39.75	0	Female
177	1	7	16.1623	4.2175	1.71266	34.43	30.96	7223.16	67.2219	60.7437	232.496	139.776	91.473	11.9121	1407.9	55	51.1667	0	0	23.3125	0	69.5833	11.3125	59.5625	87.25	112.25	35.75	0	11.6917	0	44.375	52.25	20	12.5	0	117.4	0	0	51.25	0	120	0	12.5	3.1375	6.2525	0	69	0	Male
178	2	6	13.8014	3.5885	1.48752	23.96	28.67	5337.97	34.5674	40.4786	210.431	95.636	111.628	8.42912	1031.45	21.44	0	0	30.05	0	22.125	22.5	0	83.5166	93.8375	99.75	15.25	43.6666	0	0	12.45	39	40	0	0	0	105	0	0	0	80	0	12.5	1.25	1.865	0	19.75	0	Female
179	2	6	16.1368	4.0645	1.98347	36.74	21.42	8061.8	80.0413	56.8569	258.304	107.92	148.784	10.5744	1280.7	32.16	0	0	0	0	22.125	61.0792	22.3942	76.8791	121.2	143.543	49.1625	21.8333	18.75	0	18.7312	23.75	0	12.75	0	0	105	0	0	3.345	80	0	12.5	1.25	5.595	22.5	105	0	Female
180	1	7	14.3147	4.039	1.65344	29.95	26.1	6678.24	54.0521	58.1132	230.842	108.958	119.84	14.8241	1601.02	41.25	8.83333	0	0	0	0	92.3333	16.5	110.292	250.5	149.667	112.5	58.3334	11.6917	0	40	48.625	40	0	0	117.4	0	0	0	0	120	39.2275	18.75	0	1.9825	16.5	22.5	0	Male
181	2	7	16.4808	4.1835	1.50378	27.17	31.31	6291.05	46.1939	47.0205	235.795	123.123	111.329	12.5782	1386.53	35.8875	40.5	0	7.5	0	25	44.75	5.39582	91.9613	188.25	78.4	46.9	0	0	0	26	89.25	22.5	0	0	189	64.5	65	0	0	40	0	0	1.28572	9.9975	0	15	0	Female
182	2	7	14.0524	4.06875	1.38801	34.45	30.47	5647.45	52.5772	42.249	185.948	107.552	78.0524	5.21618	1092.35	35.8875	0	17.1667	22.5	24.25	0	44.75	22.5625	26.75	0	39.2	10	84.5536	0	0	13.375	16	0	0	22.6875	94.5	0	130	0	0	40	156.91	18.25	0	6.48	0	0	0	Female
183	2	7	18.6552	4.719	1.36576	27.38	31.02	6445.03	47.6918	46.8053	242.899	124.968	114.86	7.09613	1271.13	47.85	0	8.58333	7.125	0	25	22.375	11.7708	34.4613	73.5	78.4	7.5	56.369	5.9375	24.25	41.75	55.3125	22.5	0	22.6875	0	193.5	65	91.125	0	160	39.2275	6.08332	0	7.57	0	0	0	Female
184	1	7	18.0525	4.71475	1.20008	29.27	33.86	5658.09	44.7607	55.3892	191.082	119.737	70.7931	10.6848	1166.83	70.75	67	0	0	0	0	70.9166	11.3125	39.5417	66.75	74.8334	46	0	11.6917	0	70.75	48.625	0	0	19	58.7	54.3214	0	51.25	0	80	78.455	6.25	1.56875	5.9475	7.5	0	0	Male
185	1	7	15.1535	4.0135	1.8391	25.83	28.78	7381.23	51.5275	49.1972	290.051	132.783	152.839	9.09002	1335.19	95.75	0	0	0	0	0	22.75	21.6875	80.1458	84.25	74.8334	65.75	29.1667	17.5375	0	42	15	0	0	0	58.7	108.643	110.5	0	2.75	160	0	18.75	0	4.27	0	0	0	Male
186	1	7	15.7817	3.784	1.6354	31.45	26.8	6188.36	52.5955	49.4745	212.062	103.668	107.497	8.30139	1484.53	9.75	0	28.75	0	69.9375	0	0	22.625	71.0417	73.25	30.25	63.25	29.1667	0	0	33.5	58.75	60	0	19	234.8	162.964	0	0	0	160	39.2275	12.5	0	0	0	15	0	Male
187	1	7	15.9422	3.9455	1.65643	31.66	29.99	6535.45	55.9267	46.3978	230.001	122.484	106.856	9.9128	1212.34	55	17.6667	0	0	0	25.5	22.75	22.625	36.2708	76.25	160.75	0	58.3334	16.1083	26.75	19	30.5	0	0	19	234.8	54.3214	55.25	0	0	40	0	12.5	1.56875	4.27	16.5	0	0	Male
188	1	7	15.1386	4.1495	1.45504	33.58	29.08	6037.68	54.7974	45.7609	201.068	109.739	85.7544	9.47582	1099.81	27.5	17.6667	0	22.5	23.3125	51	22.75	17.4375	19	27	112.25	0	87.5	13.25	0	14	33.625	0	0	0	117.4	54.3214	0	153.75	0	0	0	0	1.56875	3.965	0	19.5	0	Male
189	1	7	14.5653	4.022	2.20965	31.61	30.3	8887.2	75.9305	58.8592	313.78	168.322	125.149	10.7	1476.23	43.25	0	22.5	0	0	25.5	91	17.4375	140.687	0	219.667	10	29.1667	5.84583	0	20.25	45	40	12.5	38	117.4	0	110.5	0	3.90625	0	0	12.5	0	6.1	30	0	0	Male
190	1	7	16.2863	4.243	1.59204	28.88	24.93	6755.04	52.7265	52.7911	242.764	105.241	132.07	8.9755	1648.45	41.25	0	14.375	0	0	0	22.75	15.5625	122.75	91	112.25	90.5	58.3334	8.83335	0	16.375	41.75	0	0	0	176.1	54.3214	0	205	2.75	40	0	0	0	4.27	22.5	65	0	Male
191	2	7	20.1141	5.0165	1.31655	34.36	30.47	6604.46	61.3279	46.2313	221.055	125.785	92.3392	9.44267	1100.75	35.8875	7	0	15	0	50	42.625	27.9583	65.3838	26.5	0	80.4083	0	25.3125	0	44.125	0	0	0	22.6875	189	0	65	0	0	40	156.91	24.3333	5.1429	9.73	0	0	0	Female
192	2	7	13.8996	3.7585	2.17884	24.8	35.5	8189.17	54.8855	63.2246	317.685	181.72	134.42	12.3291	1664.36	59.35	7	39.9187	0	48.5	0	20.25	16.1875	38	174.25	184.9	83.5667	28.1845	0	0	38.5	53.8125	22.5	0	0	94.5	35	0	45.5625	9.5	40	156.91	18.25	5.1429	4.32	0	0	0	Female
193	2	7	17.3215	4.328	1.04668	32.55	30.33	4530.01	39.8474	25.5799	163.718	85.8675	76.7	5.44702	779.224	35.8875	0	0	0	0	0	44.75	5.39582	32	0	39.2	25.1208	28.1845	0	0	10.25	44	0	0	45.375	0	129	130	0	0	80	0	24.3333	0	5.6775	0	0	0	Female
194	2	7	17.4914	4.226	1.66362	31.77	24.65	7030.47	60.3708	55.3062	241.148	108.324	130.161	11.545	1707.65	39.675	67	8.58333	0	24.25	0	67.125	24.5208	35.5	116.875	39.2	103.425	28.1845	23.75	0	51.125	16	0	0	22.6875	141.75	193.5	195	45.5625	1.78125	80	156.91	12.1666	0	4.0525	0	65	0	Female
195	1	7	15.701	3.818	1.50605	37.2	25.89	5750.12	57.8143	40.6002	182.63	93.0486	87.37	4.76188	929.011	41.25	0	14.6875	0	0	25.5	46.8333	27.8125	54.0417	22.25	37.4167	10	29.1667	0	0	36.125	15	0	0	0	0	0	110.5	0	0	120	78.455	12.5	0	5.9475	0	19.75	0	Male
196	1	7	21.7196	4.957	1.61611	26.9	26.48	8011.07	58.2484	62.5131	299.081	132.581	161.424	10.8059	1576.77	55	8.83333	0	15	0	25.5	45.5	17.4375	130.896	132.5	90.75	85	58.3334	5.84583	0	43.75	30	20	12.5	0	234.8	54.3214	55.25	102.5	0	0	0	18.75	0	6.2525	0	25	0	Male
197	1	7	14.967	4.1665	1.69517	32.56	32.61	7062.91	62.1584	54.404	239.761	143.951	94.7369	9.97924	1132.84	52.75	8.83333	0	8.88125	0	51	45.5	18.375	138.542	27	0	48.25	29.1667	0	26.75	17.125	74.625	0	0	19	0	0	55.25	0	0	120	39.2275	12.5	0	1.9825	8.25	0	0	Male
198	2	7	15.7967	4.1495	1.00192	32.69	30.41	4157.45	36.7293	43.8521	127.22	79.0191	47.82	6.79223	972.64	31.4625	39.75	0	0	24.25	50	22.375	5.39582	26.4613	36	39.2	39.8417	28.1845	0	0	55	0	0	12.5	22.6875	47.25	0	65	0	0	160	0	0	0	0	0	15	0	Female
199	1	7	16.6325	4.40025	0.462613	25.85	19.7	2035.61	14.2198	9.80505	83.5261	25.0678	58.3044	1.64279	723.879	13.75	0	0	0	23.3125	0	0	11.3125	8.25	0	0	0	0	0	0	0	0	0	12.5	0	117.4	108.643	165.75	0	0	120	78.455	6.25	0	0	7.5	0	0	Male
200	1	6	16.8245	3.954	1.74615	33.74	27.25	6904.29	62.965	55.8733	226.763	117.569	105.627	8.226	1351.4	55.67	0	0	9.125	20	0	22.5	23.2125	67.1542	49.7841	82	45.375	27.5	0	0	53.9	60.3708	20	0	19.6875	148.125	113	0	50.25	0	80	0	19	0	8.3175	12	0	0	Male
201	1	7	18.6998	4.7275	1.88061	33.55	22.93	8890.57	80.6124	51.6962	314.509	127.44	184.102	8.38587	1573.77	66.5	0	0	0	23.3125	51	0	15.5625	173.542	187.25	149.667	10	0	17.5375	0	0	72	0	0	0	58.7	108.643	110.5	51.25	2.75	160	0	6.25	0	12.6575	0	25	0.01	Male
202	2	7	19.3638	5.0505	0.876059	33.53	27.27	4424.53	40.1018	26.3538	154.528	75.4241	77.2608	4.15218	652.886	67.35	7	0	0	0	0	0	11.7708	121.211	0	0	0	0	0	0	0	26.3125	0	37.5	0	0	129	0	0	0	80	0	12.1666	0	1.8925	0	0	0	Female
203	2	7	21.2175	4.974	1.1632	29.74	32.85	5785.75	46.5018	39.3489	212.379	118.786	87.3149	9.34736	1191.81	35.8875	0	0	33.2625	0	0	65	16.1875	41.2113	204.25	0	32.3458	0	5.9375	0	31.5	31	0	0	22.6875	94.5	0	0	182.25	0	80	39.2275	24.3333	0	6.48	0	0	0	Female
204	1	7	17.4715	4.566	1.26607	32.58	27.01	5780.9	50.9034	43.5442	197.324	97.5745	95.0589	6.96902	1169.33	27.5	0	7.1875	0	23.3125	51	45.5	15.5625	64.0208	76.25	0	16.5	29.1667	5.84583	0	27.75	57.875	20	0	19	0	54.3214	165.75	0	5.5	80	156.91	12.5	1.56875	1.9825	0	21.5	0	Male
205	1	7	15.5459	3.92	1.76088	25.86	31.79	6902.65	48.2454	54.333	262.276	137.144	124.644	8.13392	1439.56	60.25	0	21.5625	16.5667	23.3125	0	0	0	7.875	65.5	67.6667	16.5	116.667	11.6917	0	20.625	26.75	0	0	0	234.8	162.964	55.25	0	0	0	0	12.5	4.70625	8.0825	0	0	0	Male
206	1	6	17.8253	4.175	1.80416	35.5	25.92	7532.37	72.2601	57.5546	242.32	122.015	118.606	10.7319	1033.56	0	8.95	0	17.1	40	24.5625	22.5	29.775	67.9125	48	0	0	110	44.1484	0	10.25	47.875	0	0	0	197.5	0	54.375	0	0	40	0	18.75	0	3.795	16.5	0	0	Male
207	2	7	16.3387	3.96675	1.03699	32.9	30.64	4113.46	36.5796	31.1752	139.482	78.7807	60.3338	4.70591	793.768	11.9625	0	0	33.2625	24.25	25	44.75	23.5416	33.7113	26.5	0	28.2208	28.1845	19.375	0	29.125	46	0	0	0	0	64.5	65	182.25	0	40	0	6.08332	0	2.16	0	0	0	Female
208	2	7	22.9469	5.7475	1.03691	32.56	26.82	5959.67	52.4495	48.3412	199.82	99.9087	99.2489	9.85397	1185.63	59.35	0	0	0	0	0	42.625	22.5625	56.7113	208.938	35.75	37.875	56.369	21.5625	37.5	51.75	37.625	22.5	0	0	141.75	0	0	0	0	120	117.683	6.08332	0	6.48	0	0	0	Female
209	1	7	22.8832	5.484	1.42329	29.34	30.74	7805.34	61.8885	63.2752	277.723	149.939	122.297	12.5623	1389.12	55	0	0	36.0813	0	0	45.5	5.1875	67.5417	134	37.4167	56.25	58.3334	16.1083	0	20.625	40.5	0	0	19	117.4	54.3214	0	0	0	160	0	18.75	0	8.54	0	15	0	Male
210	2	7	16.5536	3.852	1.20518	29.48	23.18	4642.36	36.994	41.2635	160.995	67.244	88.0834	8.9759	1269.64	33.425	74	0	0	0	25	42.625	0	60.75	113.5	35	74.9	28.1845	0	0	34.625	11.3125	0	0	22.6875	189	0	0	45.5625	0	80	0	6.08332	0	7.57	0	32.5	0	Female
211	2	7	16.454	4.481	1.26307	27.55	31.04	5659.8	42.1491	52.7175	200.034	109.79	90.115	9.36571	1264.02	55.425	21	7.08437	7.5	0	0	62.875	29.9166	22.9225	109.75	142.25	47.7208	56.369	5.9375	0	58.25	10.25	22.5	0	0	0	64.5	0	0	0	160	0	12.1666	0	2.16	0	0	0	Female
212	1	7	15.3932	3.9455	1.41468	33.58	32.55	5581.61	50.6516	42.5155	186.147	113.555	72.2599	6.61839	1116.02	41.25	0	0	8.88125	46.625	25.5	22.75	45.25	15	39	74.8334	0	58.3334	0	0	17.125	88.625	20	0	0	58.7	54.3214	0	205	0	40	78.455	12.5	0	8.0825	0	0	0	Male
213	1	7	16.5342	4.379	1.35312	31.94	29.82	5925.3	51.1469	40.6628	210.831	110.434	97.113	7.20113	1125.79	27.5	8.83333	0	22.0667	23.3125	25.5	45.5	23.5625	88.5417	0	30.25	0	0	11.6917	0	0	33.875	40	0	57	117.4	108.643	55.25	0	0	160	0	0	0	1.9825	0	50.75	0	Male
214	1	7	16.5718	4.4725	1.4917	28.97	30.86	6671.61	52.2421	54.915	237.955	128.692	107.066	9.31624	1199.53	55	8.83333	0	17.9479	46.625	25.5	22.75	17.4375	26.2708	55.75	179.917	18.75	58.3334	5.84583	0	40.625	52.5	40	0	0	0	54.3214	0	0	3.90625	160	0	18.75	0	5.9475	0	0	0	Male
215	2	7	17.484	4.43	0.862775	40.8	32.5	3822.09	42.1497	34.8521	104.515	77.6251	26.2615	6.17003	702.123	47.85	0	0	0	24.25	25	20.25	11.7708	30	38.25	0	70.15	0	15.625	0	26.75	16	22.5	12.5	0	0	0	0	45.5625	0	160	0	0	0	8.64	0	30	0	Female
216	1	7	16.9283	4.24725	1.55953	33.18	32.73	6623.72	59.4	57.3587	216.013	135.483	79.2042	8.91284	929.875	27.5	8.83333	0	22.5	0	25.5	68.25	33.9375	73.7708	0	60.5	38.25	0	11.6917	0	59.125	19.5	0	0	19	0	0	0	0	0	80	0	0	0	3.965	8.25	0	0	Male
217	1	7	15.8891	4.277	1.33355	31.34	34.69	5703.6	48.3101	45.015	196.701	123.655	70.5922	9.94671	1120.37	41.25	26.5	0	7.5	0	25.5	68.25	0	41.2708	113.25	0	21.75	0	5.84583	0	27.75	29.25	20	0	19	234.8	54.3214	0	0	0	80	0	6.25	0	6.405	0	43	0	Male
218	1	7	15.7896	4.345	1.84368	32.76	23.94	8010.81	70.9296	65.6792	266.791	119.886	143.931	11.3632	1415.27	55	0	0	0	0	0	24.0833	22.625	127.271	193.25	184.667	64.25	116.667	5.84583	0	29	38.75	20	25	19	0	0	55.25	0	0	120	0	12.5	0	6.1	7.5	0	0	Male
219	1	7	16.9077	4.311	2.01068	26.95	36.83	8668.04	63.1397	66.0062	324.84	199.545	125.103	12.6196	1305.17	47.25	0	7.1875	22.5	23.3125	25.5	45.5	15.5625	97.0833	143	0	17.5	0	0	0	0	33.875	20	0	19	0	0	55.25	51.25	0	160	0	6.25	0	0	0	43	0	Male
220	1	7	15.8073	4.243	1.60202	31.53	24.25	6797.36	57.9154	48.2088	240.059	103.023	136.307	11.5415	1145.18	55	0	7.1875	7.5	0	0	0	26.875	32.4167	282.125	0	48.25	87.5	0	0	14	0	0	25	19	234.8	0	0	0	0	0	0	25	0	6.2525	0	0	0	Male
221	1	7	16.854	4.3875	1.28568	29.64	27.95	5640.93	45.1912	47.143	198.005	98.5329	99.1231	8.31786	1079.32	27.5	0	0	27.2	23.3125	25.5	45.5	10.375	31.25	125.5	149.667	35.5	58.3334	0	0	48.25	46.125	0	0	0	0	0	0	51.25	0	120	39.2275	6.25	1.56875	8.0825	0	0	0	Male
222	2	7	16.1934	3.9285	1.38031	31.44	25.81	5422.55	46.0809	43.981	185.742	87.4755	96.3344	6.81272	976.491	47.85	0	0	16.6313	48.5	0	42.625	12.75	41.9613	74.25	156.8	55.275	56.369	0	0	77.125	0	0	12.5	0	0	0	130	0	0	40	0	12.1666	0	6.2125	0	31.25	0	Female
223	2	7	17.4394	4.44275	1.38945	30.16	23.64	6172.98	50.3204	48.7699	217.774	91.2145	123.928	5.59008	1044.18	63.6	0	0	0	0	0	20.25	6.375	49.9613	12.75	39.2	56.525	112.738	5.9375	0	10.25	10.5	0	0	22.6875	0	193.5	0	0	3.5625	80	0	6.08332	0	8.64	0	63.75	0	Female
224	2	7	15.9838	4.0985	1.43848	43.31	27.46	5895.6	69.0183	38.4767	168.535	101.191	66.0959	8.5551	1025.84	11.9625	0	0	7.5	24.25	0	42.625	47.0833	61.6725	100.375	0	52.3417	28.1845	5.9375	0	16.5	47.3125	0	0	0	47.25	0	0	91.125	0	160	0	24.3333	0	1.8925	0	79	0	Female
225	1	7	16.7842	4.532	1.37278	26.82	23.34	6221.44	45.1007	43.0169	237.582	90.7567	143.751	11.1757	1360.27	13.75	0	0	15	0	0	68.25	15.5625	50.2708	93	70	27.5	87.5	14.6792	26.75	0	15.25	0	0	19	234.8	108.643	55.25	0	0	160	0	6.25	0	8.235	15	42	0	Male
226	1	7	13.1056	3.75	1.8327	31.58	26.69	6872.61	58.6566	44.3966	246.603	114.64	127.681	8.66734	1389.9	27.5	142.833	0	0	0	51	91	0	122.625	0	74.8334	29.25	29.1667	23.3833	0	10.25	0	0	12.5	0	0	162.964	0	153.75	0	160	156.91	0	4.70625	6.1	0	0	0	Male
227	1	7	15.0464	4.2345	1.90092	34.91	32.4	8049.43	75.9456	54.458	269.039	163.002	103.695	10.7266	1270.07	37.25	8.83333	15	0	69.9375	51	24.0833	16.5	98.7708	154	0	26	29.1667	0	0	18.875	57.375	0	0	38	0	0	110.5	0	0	120	117.683	12.5	0	5.9475	0	75.5	0	Male
228	2	7	16.4833	4.1665	1.7551	33.47	25.78	7312.62	66.1578	61.1225	239.353	117.839	119.262	11.4548	1518.72	47.85	0	0	0	0	0	109.75	34.3333	52.6725	58.5	156.8	92.275	56.369	5.9375	0	65.125	22.625	45	25	22.6875	47.25	193.5	0	0	0	160	39.2275	12.1666	0	7.8375	0	0	0	Female
229	1	7	18.1847	4.4385	1.13309	26.38	28.66	5029.23	35.8509	46.0001	182.793	90.0936	90.5967	8.4478	1299.83	27.5	0	14.375	16.5667	23.3125	0	92.3333	5.1875	50.5417	90	121	95.75	116.667	0	0	38.25	30	20	0	19	117.4	0	0	102.5	0	120	0	0	0	4.27	0	0	0	Male
230	1	7	15.8434	4.2515	1.59206	26.4	27.55	6768.63	48.299	53.8706	253.989	116.567	134.247	8.58946	1364.66	27.5	0	0	25.6334	23.3125	25.5	69.5833	10.375	55.0417	71.5	37.4167	52.5	29.1667	0	0	28	59.375	0	0	19	234.8	108.643	165.75	0	0	0	0	0	0	4.27	0	19.5	0	Male
231	1	7	14.5372	3.7245	1.60755	32.48	25.72	5987.32	52.5559	48.0293	201.707	96.2379	103.72	7.76511	1291.31	50.75	0	0	0	46.625	25.5	46.8333	10.375	39	48.3625	149.667	80.75	0	16.1083	0	14	88.125	20	12.5	0	0	217.286	221	0	2.75	120	0	0	0	7.93	0	21.5	0	Male
232	1	7	18.9066	4.532	1.53998	32.67	34.25	6979.19	61.6222	51.3213	239.37	149.418	88.2787	11.5988	1166.89	41.25	17.6667	7.1875	0	0	51	69.5833	10.375	75.4375	44.5	30.25	46.25	0	5.84583	0	37.125	45.25	20	0	19	117.4	108.643	0	51.25	0	120	0	6.25	0	4.27	0	0	0	Male
233	1	7	15.3624	4.1325	1.65234	33.7	32.59	6828.29	62.1997	61.2845	217.868	139.076	77.3399	10.4115	1101.34	41.25	0	0	0	0	25.5	22.75	23.5625	34.2708	22.75	0	46	87.5	11.6917	0	66.75	12.5	0	0	0	234.8	54.3214	0	51.25	0	0	39.2275	18.75	0	8.0825	0	22.5	0	Male
234	1	7	16.1389	4.0815	1.28211	33.98	24.18	5232.94	48.065	44.1837	168.435	79.0734	87.2285	6.36812	1271.92	39.25	0	0	8.88125	0	0	46.8333	16.5	56.7917	111	142.5	17.25	0	11.6917	0	66.25	10.5	0	12.5	0	234.8	0	110.5	102.5	0	120	0	6.25	0	5.9475	0	21.5	0	Male
235	2	7	16.1866	3.9455	1.72058	31.49	29.75	6788.57	57.7831	48.7013	239.608	126.214	112.031	6.52822	982.822	47.85	33.5	0	6.5	0	25	22.375	34.3333	38.4225	4.1875	0	20	112.738	11.25	0	26.75	32	0	0	0	189	0	195	0	0	80	0	24.3333	1.28572	6.48	0	11.75	0	Female
236	2	7	17.0997	4.5235	2.05803	30.66	22.4	9309.48	77.1375	46.1908	354.632	130.338	219.689	10.012	1390.59	35.8875	0	8.58333	7.125	0	50	65	19.125	94.6338	152.75	0	9.625	28.1845	5.9375	0	26.75	56.3125	22.5	0	45.375	94.5	193.5	260	45.5625	0	0	0	18.25	0	4.0525	0	21.5	0	Female
237	2	7	15.5214	3.9455	1.82827	30.46	27.62	7213.43	59.3855	48.6817	261.158	124.542	135.659	11.5414	1426.95	45.6375	67	0	8.31563	24.25	50	42.625	10.7916	65.6338	176	117.6	27.5	28.1845	11.875	0	30.75	39.5	45	0	22.6875	141.75	129	0	136.688	0	40	27	24.3333	1.28572	3.785	0	0	0	Female
238	1	7	17.4892	4.328	1.68586	29.61	28.84	7296.38	58.3827	58.0938	257.172	131.54	122.63	12.2944	1340.04	23.5	0	0	30	0	0	92.3333	10.375	90.5625	54	37.4167	69.25	58.3334	0	26.75	45.125	26.5	20	0	19	234.8	0	0	51.25	5.5	40	0	6.25	0	2.135	0	42	0	Male
239	2	7	20.4788	4.8805	0.893776	35.13	29.54	4362.07	41.4136	32.5159	142.337	80.5449	61.7184	5.14958	977.256	23.925	0	0	33.2625	48.5	0	22.375	5.39582	13.5	104	117.6	8.25	0	17.8125	0	13.375	49.9375	0	0	0	141.75	64.5	0	45.5625	0	80	39.2275	12.1666	2.57145	6.48	0	0	0	Female
240	2	7	16.4532	4.4385	1.49771	31.16	21	6647.57	55.9762	58.1753	224.311	87.2343	135.211	8.31656	1269.35	23.925	0	0	7.5	0	50	0	11.7708	74.845	137.5	153.35	9.625	84.5536	11.875	0	43.375	46	22.5	12.5	0	47.25	0	195	0	4.75	80	0	6.08332	0	0	12	62.5	0	Female
241	2	7	14.5471	4.0305	2.00971	32.18	33.13	8100.15	70.4385	55.9575	283.034	167.738	115.044	13.5235	1501.17	33.675	100.5	8.58333	0	48.5	0	44.75	34.3333	97.845	53	0	48.15	28.1845	11.875	24.25	25.75	0	45	0	22.6875	0	64.5	195	91.125	0	160	0	24.3333	2.57145	3.785	0	46.5	0	Female
242	1	7	14.168	3.852	1.82015	30.73	28.88	7011.22	58.2308	58.9067	241.226	126.553	113.26	8.78168	1388.17	41.25	0	7.1875	22.5	0	0	93.6666	16.5	88.0833	92.75	142.5	48.5	29.1667	11.6917	0	68.375	33.625	20	12.5	19	117.4	54.3214	55.25	0	0	160	0	6.25	0	4.27	0	10.5	0	Male
243	1	7	18.6778	4.29825	1.60962	30.08	30.67	6918.56	56.2427	42.6681	257.095	132.628	124.048	9.20083	940.95	55	17.6667	14.375	9.06668	23.3125	0	45.5	29.6875	99.3125	76.25	149.667	0	58.3334	0	0	0	63.875	0	0	0	58.7	54.3214	0	0	0	0	39.2275	12.5	4.70625	10.37	0	0	0	Male
244	2	7	17.0226	4.6935	1.40769	31.99	20.64	6607	57.125	50.4218	226.172	85.2417	137.208	9.47856	1457.71	43.175	33.5	7.08437	0	24.25	0	0	17.1666	90.7113	208.75	156.8	44.3708	84.5536	15.625	24.25	15	11.3125	0	0	22.6875	141.75	0	65	0	0	40	0	6.08332	0	7.57	15	0	0.01	Female
245	1	7	15.6669	3.8435	1.71017	31.72	28.1	6573.05	56.3449	48.0286	229.766	115.456	112.347	10.038	1310.04	41.25	0	14.375	0	0	0	45.5	16.5	30.25	273.188	0	22.5	29.1667	5.84583	0	6.875	30	0	12.5	38	176.1	54.3214	0	51.25	0	0	0	12.5	0	6.405	0	0	0	Male
246	2	7	14.8436	3.96675	1.73379	36.92	30.96	6877.53	68.6254	55.5381	212.104	133.061	83.1233	11.5127	1326.75	55.1375	7	8.58333	6.5	24.25	25	67.125	23.5416	26.4613	60.25	185.65	77.125	56.369	17.8125	0	57.375	48.9375	22.5	0	22.6875	94.5	0	0	91.125	0	120	0	24.3333	2.57145	5.945	0	0	0	Female
247	1	7	15.5261	4.0475	2.36458	29.87	23.75	9570.64	77.2549	70.077	343.52	142.079	198.204	18.0691	1703.01	13.75	8.83333	0	0	0	0	93.6666	33	63.0833	137.5	149.667	126.5	87.5	0	0	45.875	33.625	40	12.5	0	0	217.286	0	0	3.90625	80	0	0	0	5.9475	30.75	51.5	0.005	Male
248	1	7	17.9743	4.84225	1.57278	31.3	24.45	7615.79	64.4262	63.0027	260.357	116.374	142.419	12.2425	1346.6	27.5	26.5	0	17.9479	0	76.5	22.75	12.25	28.375	154.25	149.667	37	87.5	0	26.75	30.375	10.5	0	12.5	19	58.7	0	0	0	17.2188	80	0	0	3.1375	7.93	0	0	0	Male
249	1	7	18.6506	4.2855	1.73652	38.72	25.13	7441.85	77.8849	58.5773	222.318	116.872	103.392	10.2604	1326.19	51	0	0	0	0	25.5	46.8333	27.8125	103.042	188.25	60.5	54.25	58.3334	5.84583	0	44.375	72.375	0	25	19	117.4	0	55.25	102.5	2.75	40	39.2275	18.75	0	6.2525	0	21.5	0	Male
250	2	7	19.9822	4.9145	1.19459	28.95	28.91	5870.83	45.9417	40.4076	217.555	106.085	106.963	7.14714	1023.23	51.6375	0	0	7.5	24.25	0	67.125	6.375	138.384	51.625	0	16.7208	28.1845	11.875	0	10.25	28	22.5	0	22.6875	94.5	164	0	45.5625	1.78125	0	0	6.08332	0	6.48	0	66	0	Female
251	1	7	14.0617	4.022	1.75684	27.62	21.54	7066.02	52.7434	51.1867	265.072	95.1082	167.401	6.76766	1127.33	41.25	8.83333	0	7.5	23.3125	0	0	12.25	30.625	159	0	0	116.667	17.5375	0	23.5	15	0	0	38	176.1	108.643	55.25	0	0	0	0	6.25	0	6.405	0	0	0	Male
252	1	7	13.3195	3.8605	2.14954	32.54	27.88	8298.29	72.9737	57.7758	288.779	144.59	141.522	8.45128	1398.73	55	0	0	18.1334	23.3125	25.5	46.8333	26.875	78.9583	56.5	37.4167	45.75	87.5	0	0	27.75	48.625	0	12.5	38	176.1	162.964	110.5	0	7.8125	40	0	18.75	0	7.93	0	0	0	Male
253	2	7	16.2724	4.09	1.5373	32.25	31.13	6287.55	54.8023	71.7699	190.26	122.332	67.5625	8.74893	1361.39	47.85	0	0	0	24.25	50	22.375	16.1875	16	69.5	0	10	28.1845	0	0	61.125	38.625	45	0	22.6875	94.5	0	130	136.688	0	120	0	0	0	7.57	0	0	0	Female
254	1	7	15.5613	3.716	1.81778	33.02	38.98	6754.86	60.2747	53.8519	225.681	164.56	59.9427	16.6917	1267.13	23.25	17.6667	0	0	0	51	45.5	6.125	12.2708	43.75	37.4167	117.5	29.1667	0	26.75	26.75	37	0	0	38	58.7	0	55.25	51.25	2.75	80	117.683	18.75	0	6.1	16.5	0	0	Male
255	2	7	16.745	4.2855	1.18791	32.12	35.18	5090.79	44.19	33.7102	178.942	111.945	66.3351	6.87397	920.744	64.8875	0	0	7.5	24.25	0	0	18.1458	31	53	153.35	16.75	28.1845	0	0	20.375	26.3125	0	0	22.6875	94.5	0	65	91.125	0	40	0	12.1666	0	2.16	0	52.75	0	Female
256	1	7	19.3251	4.6595	1.29108	27.67	30.73	6015.79	44.9934	55.8255	212.723	115.534	94.6374	10.8936	1313.26	23.25	8.83333	0	0	23.3125	0	46.8333	11.3125	36	103.25	132.917	55.25	58.3334	11.6917	0	24.25	55.75	0	0	0	117.4	54.3214	55.25	51.25	0	80	0	12.5	0	2.135	0	39	0	Male
257	2	7	17.9748	4.7275	0.970307	27.62	26.14	4587.13	34.2443	34.7743	170.07	74.9366	93.5126	6.93512	1123.37	33.675	67	0	0	0	0	65	0	58.7113	37	191.8	57.1917	0	5.9375	0	23.625	22.625	0	0	0	0	0	195	0	0	160	0	0	0	6.48	8.25	25	0	Female
258	2	7	18.2737	4.89325	1.92769	34.49	23.07	9432.66	87.9352	85.8151	295.615	135.98	159.041	15.922	1713.56	37.4625	0	0	0	48.5	0	44.75	53.4583	127.056	201	39.2	138.842	112.738	17.8125	0	90.875	16	0	0	0	141.75	0	0	91.125	0	120	0	6.08332	0	5.6775	33	0	0	Female
259	1	7	15.7677	4.0475	1.83907	35.9	25.92	7443.62	72.2201	61.7833	232.747	120.603	110.527	9.80798	1468.89	41.25	8.83333	7.5	0	23.3125	0	69.5833	15.5625	96.7917	143	112.25	58.5	58.3334	5.84583	0	56.75	45	0	0	0	117.4	54.3214	0	0	0	160	39.2275	12.5	0	6.405	0	46.25	0	Male
260	2	7	16.0712	3.8775	2.04913	29.31	21.56	7945.5	62.9384	53.6784	293.751	107.055	183.361	12.7227	1637.21	11.9625	0	0	0	24.25	75	44.75	18.1458	113.923	322.5	70.75	103.442	0	5.9375	0	44.875	32	22.5	0	45.375	0	129	195	45.5625	14.8438	40	0	0	0	1.8925	0	21.5	0	Female
261	2	7	20.8125	4.9655	1.28034	35.06	30.64	6357.54	60.2451	51.736	203.091	121.737	79.955	14.7301	1195.28	33.675	21	0	0	0	25	67.125	11.7708	41.8838	113	0	91.7208	56.369	17.8125	0	20.5	0	22.5	0	0	0	0	65	0	0	160	0	12.1666	0	2.16	16.5	54	0	Female
262	1	7	15.1844	4.226	1.36177	30.91	35.83	5754.85	48.0723	39.6967	206.509	128.864	77.3352	10.6752	899.307	55	17.6667	0	18.1334	0	0	0	16.5	32.7917	27	60.5	10	0	0	0	33	18.625	60	0	0	0	0	165.75	0	0	160	0	25	0	3.965	0	0	0	Male
263	2	7	22.0146	5.3905	0.981102	32.45	27.2	5288.63	46.3786	43.6625	176.276	89.8975	85.5693	6.12351	1075	34.9625	0	0	7.125	0	0	44.75	27.9583	72.9613	34.25	117.6	46.775	56.369	11.875	0	23.625	15	0	0	22.6875	94.5	0	0	0	0	160	0	18.25	0	1.8925	0	25	0	Female
264	1	7	21.1951	5.28	1.56139	33.59	19.29	8244.14	74.8364	55.0916	280.991	99.3732	157.828	6.49832	1634.76	13.75	0	14.6875	7.5	23.3125	0	69.5833	16.5	116.833	107	350.167	37.5	87.5	17.5375	0	0	58.75	0	0	0	0	0	110.5	102.5	5.5	120	0	6.25	1.56875	8.54	0	0	0	Male
265	2	7	13.9269	4.0645	1.55643	27.4	35.96	6326.1	46.8402	54.4673	229.376	142.199	85.9513	13.0605	1286.38	35.8875	0	21.2531	0	24.25	0	20.25	10.7916	91.4613	164.5	107.25	34.9708	28.1845	5.9375	0	29.625	14	22.5	0	45.375	0	0	0	0	0	160	0	6.08332	0	2.16	0	0	0	Female
266	2	7	16.6029	4.11975	1.22981	34.46	32.9	5066.49	47.1878	30.4171	174.954	104.176	70.3239	9.21854	835.685	0	0	0	8.31563	0	0	65	12.75	34.3838	117.5	0	20.65	0	0	0	7.875	6.25	0	0	45.375	189	0	0	0	0	80	0	6.08332	0	5.6775	0	52.75	0	Female
267	2	7	16.4763	3.988	1.88837	28.19	27.32	7530.81	57.3821	56.0513	279.397	128.569	147.541	12.1521	1467.12	51.6375	7	7.08437	13	24.25	0	40.5	35.3125	30.4225	205.362	220.65	57.775	56.369	17.8125	0	26.75	26.25	22.5	0	0	141.75	64.5	65	0	0	160	0	18.25	1.28572	7.57	0	0	0	Female
268	1	7	18.0518	4.379	1.7056	28	28.74	7468.84	56.5214	62.6574	269.516	134.168	134.021	16.2621	1605.18	55	35.3333	0	0	23.3125	0	46.8333	6.125	79.0417	152.362	67.6667	52	58.3334	5.84583	53.5	45.75	30.25	60	25	0	0	162.964	55.25	51.25	0	80	156.91	6.25	0	5.9475	0	0	0	Male
269	2	7	19.069	4.5575	1.45978	35.31	24.23	6652.93	63.4945	63.7643	202.265	100.763	98.8269	9.65078	1404.15	23.925	21	8.58333	0	48.5	25	44.75	18.1458	57.25	106.5	78.4	36.4417	56.369	11.875	24.25	82.5	27.5	0	25	22.6875	141.75	0	65	182.25	0	40	78.455	6.08332	3.85717	6.2125	0	0	0	Female
270	1	7	15.7538	4.21325	1.46997	37.7	22.23	6193.34	63.098	50.9685	186.126	86.0642	95.0344	5.41055	1096.72	55	0	0	22.5	0	25.5	45.5	5.1875	94.8125	54	37.4167	14.75	29.1667	17.5375	0	6.25	109.875	0	0	19	234.8	0	0	0	5.5	40	0	6.25	0	3.965	0	0	0	Male
271	1		18.7045			33.66	32.12	6688.99	60.8563	58.7894	214.989	134.272	77.5121	11.9983	1114.49	27.5	0	0	0	23.3125	0	0	27.8125	71.7708	31.1875	0	74	58.3334	23.3833	0	17.125	37.5	23.25	12.5	0	58.7	0	0	51.25	5.5	160	0	6.25	0	8.235	0	0	0	Male
272	1	7	15.9657	4.532	1.24004	32.85	30.57	5619.85	49.8893	41.3024	190.733	107.369	81.533	6.67237	1121.78	46.75	0	7.5	23.8813	23.3125	0	0	6.125	106.021	4.1875	37.4167	17.25	29.1667	5.84583	0	0	25.5	20	0	19	234.8	35	0	0	0	120	66.2275	12.5	0	8.0825	0	0	0	Male
273	1	6	17.8055	4.7445	1.71244	33.97	20.88	8124.67	74.5988	70.8875	259.654	106.032	153.027	13.2992	1492.94	27.835	67	0	6	0	0	67.5	6.5625	83.2	190.362	164	104.688	110	26.5187	0	13.25	17.9375	40	0	19.6875	49.375	0	0	0	3.41668	120	0	12.5	0	17.3625	0	126.5	0	Male
274	1	7	15.0522	4.11125	2.33613	36.4	27.53	9604.41	94.4918	69.5602	308.381	165.264	140.352	13.1343	1526.84	78.5	0	0	17.9479	0	0	45.5	27.8125	86.6875	122.75	0	80.5	29.1667	5.84583	0	28	65.25	20	50	19	234.8	54.3214	0	51.25	2.75	120	0	12.5	0	10.065	8.25	15	0.0125	Male
275	1	7	14.5019	3.5545	1.38155	31.65	34.89	4910.73	42.0037	46.5302	160.483	107.079	51.5625	12.4537	924.15	13.75	17.6667	0	8.88125	23.3125	0	117.75	11.3125	42.1458	71.75	37.4167	79	0	0	0	52.5	15	20	12.5	19	0	0	0	0	0	160	0	0	0	8.54	0	0	0	Male
276	1	7	15.829	4.17075	1.56514	32.89	23.24	6527.81	58.0311	44.7639	226.049	94.8202	127.164	9.42637	1394.6	50.75	0	0	7.5	23.3125	0	69.5833	22.625	88.3125	175	128.167	98.25	58.3334	0	0	34	11.5	0	12.5	19	234.8	35	0	0	5.5	160	0	6.25	0	7.93	0	41.75	0	Male
277	1	7	18.7547	4.872	1.7176	36.35	29.72	8368.14	82.2088	71.1342	257.385	155.427	97.8832	12.7035	1305.91	61	0	0	0	46.625	25.5	46.8333	25.9375	29	61.75	67.6667	93.25	29.1667	8.83335	0	72	89.125	0	0	0	117.4	0	110.5	0	0	80	144.683	18.75	3.1375	6.405	0	0	0	Male
278	1	7	18.9152	4.71475	1.24265	34	31.14	5858.8	53.8454	44.6166	194.453	114.025	79.8148	5.54883	987.484	41.25	0	14.375	0	0	51	22.75	22.625	32.625	0	0	0	0	0	0	26.75	49.625	0	0	19	234.8	54.3214	110.5	0	0	40	0	0	0	2.135	0	0	0	Male
279	2		15.9362			31.95	31.74	6706.16	57.9052	41.6547	240.786	133.028	107.146	7.71779	1192.25	35.8875	0	25.75	0	48.5	50	0	5.39582	67.6725	157.25	114.15	10	0	11.875	0	7.875	59.75	0	0	0	94.5	129	0	0	4.75	80	0	12.1666	0	4.32	0	0	0	Female
280	2	7	13.8609	3.801	1.67867	35.21	22.89	6380.63	60.716	41.453	214.422	91.2638	118.07	6.40467	892.441	35.8875	0	0	0	0	50	22.375	16.1875	73.2113	69.5	0	37.4	84.5536	17.8125	0	18.125	65.75	0	0	0	189	64.5	65	0	9.5	0	0	18.25	0	1.8925	0	25	0	Female
281	1	7	14.4151	3.56725	1.66665	34.11	32.91	5945.36	54.8059	43.284	197.596	122.288	75.0847	7.99517	1074.29	64.75	0	0	0	0	25.5	45.5	11.3125	71.2708	71.5	0	34	29.1667	23.3833	0	0	59.5	0	0	0	117.4	0	0	205	0	40	0	18.75	0	6.405	7.5	0	0	Male
282	1	7	16.2733	4.1325	1.19382	27.68	30.51	4933.45	36.9106	45.784	174.002	94.0735	79.4364	5.96926	1205.19	27.5	0	0	12	0	0	0	6.125	57.5	69.25	0	6	58.3334	10.2625	0	48.875	28.875	0	0	0	176.1	162.964	0	51.25	0	40	156.91	12.5	0	4.1175	0	0	0	Male
283	1	7	19.1218	4.498	1.26989	27.91	37.12	5711.98	43.094	46.9884	206.895	132.508	74.0429	8.44745	1289.68	55	0	7.1875	8.88125	46.625	0	68.25	15.5625	58.0625	12.75	0	41.75	29.1667	5.84583	26.75	40.375	23.75	0	0	19	234.8	54.3214	0	51.25	0	80	39.2275	0	0	4.27	0	0	0	Male
284	1	7	16.8921	4.12825	1.67916	33.68	24.46	6931.99	63.0944	59.5978	223.386	105.955	116.119	10.5383	1493.01	51	26.5	0	0	23.3125	25.5	69.5833	18.375	55.2917	163.5	67.6667	10	116.667	17.5375	26.75	24	69.5	20	0	19	176.1	35	110.5	51.25	0	40	117.683	12.5	0	6.1	0	0	0	Male
285	2	7	15.314	4.1325	0.898254	34.52	31.16	3712.04	34.6343	32.0859	117.88	72.3034	44.3701	5.66755	899.014	35.8875	0	0	0	0	25	44.75	11.7708	7.5	48	39.2	25.1208	28.1845	0	0	41.75	59.8125	0	0	0	141.75	0	65	0	0	80	39.2275	6.08332	0	5.6775	0	0	0	Female
286	2	7	17.1472	4.294	1.35476	24.72	24.99	5817.32	38.8724	53.3426	217.2	90.8716	123.037	8.56782	1337.47	23.925	21	0	7.5	0	0	42.625	10.7916	117.961	73.6875	117.6	64.4	56.369	11.875	0	37	45.3125	0	0	0	141.75	0	195	0	0	40	0	0	0	0	0	0	0	Female
287	1	7	15.0694	3.767	2.07455	29.49	32.84	7814.81	62.2766	60.189	280.682	160.377	117.961	10.2343	1311.52	41.25	8.83333	0	30	69.9375	0	46.8333	21.6875	67.2708	86.75	0	36	87.5	5.84583	0	10.25	55.875	0	0	0	176.1	0	0	51.25	0	160	0	12.5	0	2.135	0	47.5	0	Male
288	2	7	18.7062	4.5915	1.00466	30.12	29.14	4612.89	37.5452	40.943	157.953	84.0201	73.4941	7.28691	1090.38	11.9625	0	0	16.6313	24.25	0	67.125	12.75	31	53	0	32.6208	56.369	0	0	49	31.3125	0	0	0	47.25	64.5	65	45.5625	4.75	80	156.91	12.1666	0	1.8925	0	0	0	Female
289	2		16.0077			30.71	32.74	4570.45	37.9289	31.4291	165.692	93.5214	71.4733	8.24938	1070.89	35.8875	14	0	0	24.25	0	130	6.375	71.9225	82.375	39.2	48.5	28.1845	0	0	21.25	16	0	0	22.6875	47.25	0	130	45.5625	0	160	0	0	0	6.48	0	32.5	0	Female
290	1	7	16.7108	3.9115	1.13187	31.58	32.35	4427.33	37.7871	31.8299	155.003	89.5087	64.5631	5.69292	849.26	64.75	8.83333	0	0	23.3125	0	45.5	12.25	22.75	22.25	0	0	29.1667	0	0	0	67.25	0	0	0	234.8	0	0	0	0	80	0	12.5	0	2.135	8.25	0	0	Male
291	2	7	14.5157	3.9965	1.82258	29.93	27.62	7283.96	58.9231	46.4433	269.845	125.755	140.561	12.4715	1424.5	23.925	14	0	0	48.5	0	65	28.9375	114.845	135.125	0	51.5	56.369	0	0	16.5	82.5	45	0	22.6875	0	129	195	91.125	0	120	0	18.25	0	3.785	0	0	0	Female
292	2	7	17.8568	4.23875	1.71349	33.28	27.4	7263.07	65.3277	63.6036	236.958	124.403	110.543	13.7786	1457.1	39.675	0	0	16.6313	24.25	0	67.125	11.7708	56.4613	147.375	0	82.025	84.5536	11.875	0	76.375	33.5	67.5	0	22.6875	189	64.5	0	0	0	120	0	12.1666	0	5.6775	7.5	15.5	0	Female
293	1	7	22.7439	5.5095	0.93181	28.68	26.61	5133.81	39.7981	36.3056	190.136	85.3733	101.839	4.52001	1045.09	41.25	0	7.5	16.3813	0	25.5	22.75	21.6875	77	0	0	28.25	87.5	5.84583	26.75	20.875	15.25	0	0	38	234.8	0	110.5	51.25	0	40	0	18.75	0	3.965	0	0	0	Male
294	2	7	14.8539	3.98375	1.9348	37.04	26.68	7707.77	77.17	57.4544	242.728	128.543	109.978	7.3578	1298.24	57.6	0	0	7.125	0	0	67.125	28.9375	84	0	192.55	26.75	56.369	23.75	0	13.375	11.3125	22.5	0	22.6875	141.75	0	0	0	0	120	39.2275	18.25	0	7.57	0	0	0	Female
295	2	7	21.7663	5.2885	1.02532	27.96	28.98	5422.4	40.9755	50.8369	191.6	98.2021	80.27	8.85767	1171.36	51.6375	0	0	6.5	0	0	67.125	0	33.7113	78.75	145.7	66.4	28.1845	11.875	0	40.125	0	0	12.5	22.6875	94.5	64.5	0	45.5625	0	80	0	6.08332	0	1.8925	0	40	0	Female
296	2	7	17.7593	4.073	1.25128	21.8	38.2	5096.45	30.026	40.0676	207.4	121.679	85.3692	10.2101	1235.75	39.675	0	0	24.9469	48.5	0	62.875	0	38.2113	138.112	117.6	34.25	84.5536	0	0	23.625	10.5	22.5	0	22.6875	0	0	0	0	0	160	156.91	0	0	6.2125	0	0	0	Female
297	1	7	16.2293	4.2685	1.69124	25.55	28.11	7219.06	49.8474	59.5542	269.23	126.82	131.629	9.92611	1247.4	64.75	0	0	26.6438	0	0	22.75	23.5625	65	122.5	0	37.75	87.5	4.41668	26.75	42	61.5	20	0	0	234.8	54.3214	0	0	0	120	0	18.75	0	4.27	0	0	0	Male
298	2	6	15.2041	3.784	1.42727	30.78	24.67	5400.8	44.9351	41.3184	189.931	83.2684	103.676	12.0737	1334.4	0	15.7125	5.40715	0	23.25	0	90	6.1875	52.2375	303.862	154.171	46.9542	0	6.25	0	18.7312	47.8125	0	0	21.625	211.5	0	0	0	0	0	0	12.5	2.5	3.825	0	19.5	0.0075	Female
299	1	7	15.0841	4.03475	1.90262	34.89	20.07	7676.6	72.3847	62.6418	246.089	96.2939	148.184	13.8345	1175.94	0	0	0	0	0	25.5	45.5	24.5	22	81	0	26	87.5	0	0	27.75	45	0	0	0	0	217.286	0	0	0	120	0	18.75	6.275	7.93	33	19.5	0.0075	Male
300	2	7	18.4033	4.1835	1.53742	31.87	27.71	6431.81	55.4026	52.6058	217.033	111.393	105.522	7.90531	1267.46	47.85	0	0	22.5	0	25	83.125	6.375	38.6725	65.75	0	45	28.1845	0	0	57.25	30.8125	0	0	0	94.5	129	65	45.5625	0	80	0	12.1666	0	8.64	0	21.5	0	Female
301	2	7	15.748	4.192	1.04878	27.89	32.1	4396.48	33.1446	36.3808	159.588	88.2069	71.2665	6.90027	962.95	35.8875	7	0	15.4406	0	25	0	23.5416	38.9225	149.5	35.75	16.5	28.1845	0	0	26.75	54	0	0	0	94.5	0	0	0	4.75	160	0	0	0	5.6775	0	0	0	Female
302	1	7	15.9142	4.0135	2.66043	35.65	25.42	10677.6	102.885	86.5949	339.214	169.653	165.957	14.4466	1904.17	27.5	8.83333	14.375	6.5	0	0	93.6666	40.0625	141.292	95.5	74.8334	58.25	29.1667	16.1083	0	43.75	18.625	20	37.5	38	234.8	0	221	0	0	160	0	25	3.1375	4.1175	16.5	46.25	0	Male
303	1	7	16.4775	4.45125	1.61214	30.97	29.3	7176.05	60.0681	51.9794	253.523	131.39	117.227	8.16415	1360.91	64.5	0	7.1875	21.5	23.3125	25.5	22.75	0	63.5208	25.5	177.5	28.25	0	0	26.75	43.5	55.75	0	0	0	0	108.643	165.75	51.25	0	40	0	18.75	0	3.965	0	0	0	Male
304	1	7	18.1416	4.5575	1.07993	31.72	31	4921.8	42.1937	38.2117	169.643	95.3535	70.0027	10.4935	1244.88	0	42.3333	0	0	23.3125	51	69.5833	11.3125	56.6458	93.25	0	103	0	0	0	28	57.625	0	0	38	117.4	54.3214	55.25	153.75	0	160	0	6.25	0	3.965	0	0	0	Male
305	2	7	14.6687	3.9455	1.44531	34.99	30.14	5702.46	53.9191	46.599	182.336	107.414	74.856	10.9076	1234.98	47.85	21	0	0	24.25	25	44.75	12.75	0	96	156.8	50.1208	56.369	17.8125	0	31.75	52.625	45	0	0	141.75	0	0	91.125	0	160	0	24.3333	0	10.5325	0	0	0	Female
306	2	7	17.0087	4.17075	1.41642	29.63	33.05	5907.53	47.3029	42.8448	213.515	122.028	85.3914	9.20059	1216.24	47.85	0	0	0	48.5	0	22.375	11.7708	42.4613	156.5	152.6	14.4708	28.1845	7.5	0	16.5	54.3125	22.5	0	45.375	94.5	64.5	0	91.125	0	80	0	12.3333	0	8.105	7.5	0	0	Female
307	1	7	17.381	4.4725	1.7802	37.94	26.36	7961.96	81.6495	56.449	247.793	131.173	116.1	8.90318	1493.37	41.25	0	14.375	15	23.3125	25.5	69.5833	22.625	99.2083	39.75	74.8334	52.75	58.3334	23.3833	0	14	59.75	0	0	0	176.1	0	55.25	51.25	0	80	39.2275	6.25	1.56875	8.54	0	0	0	Male
308	2	7	12.8258	3.80525	1.79126	38.05	25.68	6816.2	70.0995	47.276	215.79	109.388	106.271	8.09187	1070.48	23.925	0	0	20.125	0	50	22.375	41.6875	24.9613	21.5	78.4	46.65	56.369	9.6875	0	33.875	29.75	22.5	0	0	189	64.5	0	0	0	40	0	24.3333	0	7.57	0	0	0	Female
309	1	6	17.094	4.022	1.19045	31.92	30.1	4787.98	41.3048	45.4981	155.506	90.0781	64.1577	8.67455	898.515	41.7525	0	0	0	20	0	47.1875	6.5625	48.725	32.6591	82	104.7	55	16.889	24.5	45.825	14.1875	0	0	0	49.375	0	0	0	0	40	0	0	0	5.6925	18	32.5	0	Male
310	1	7	23.5337	5.722	0.872123	34.82	28.84	4990.29	46.9682	53.7733	146.343	89.9526	55.9689	6.09282	919.7	43.25	0	0	9.06668	0	0	46.8333	5.1875	28.7708	40.25	0	22	58.3334	17.5375	0	43.5	25.5	0	0	19	117.4	0	0	102.5	0	0	0	0	0	4.27	8.25	0	0	Male
311	1	7	20.3397	5.11425	1.04388	32.76	28.7	5338.67	47.2715	52.4195	168.549	95.7599	72.152	9.49506	1440.32	55	0	0	0	23.3125	25.5	45.5	11.3125	8.25	150	37.4167	79.5	58.3334	5.84583	0	69.375	23.75	0	12.5	0	176.1	70	0	205	5.5	160	0	6.25	0	7.93	0	0	0	Male
312	2	6	18.766	4.413	1.06084	33.86	28.54	4681.47	42.8471	42.335	149.023	83.4921	63.9996	6.54332	952.375	32.16	43.975	0	6.5	23.25	0	67.5	5.00962	33.175	81.9688	33.25	27.7063	0	6.25	0	44.65	27	0	12.75	0	0	0	52.8438	90.0625	2.25	80	39.2275	6.25	0	3.825	0	0	0	Female
313	2	7	17.1834	4.124	1.25825	28.42	26.23	5189.04	39.8618	35.7521	195.099	85.0824	108.17	7.1592	1278.15	23.4625	0	7.08437	0	24.25	50	62.875	10.7916	30.5	83.375	0	23.7208	84.5536	0	0	37.625	46	0	12.5	0	94.5	193.5	130	0	4.75	160	0	6.08332	0	4.32	0	0	0	Female
314	1	7	26.5868	5.926	1.17694	31.05	23.09	6974.54	58.5258	54.0928	242.291	100.667	135.087	9.29881	1242.82	55	0	0	22.5	23.3125	0	45.5	0	73.4167	137.188	74.8334	39.25	87.5	0	0	20.875	30	20	0	38	58.7	54.3214	55.25	0	0	40	0	18.75	0	8.54	0	0	0	Male
315	2	7	16.3658	4.2345	2.23702	33.06	24.62	9472.65	84.6379	66.9812	325.216	145.768	179.133	10.2268	1226.5	47.85	0	0	0	24.25	25	0	30.8958	52.4225	53	156.8	10	112.738	0	0	61.375	96	0	0	0	189	193.5	0	0	5.34375	40	0	18.25	0	0	24.75	0	0	Female
316	2	7	15.0438	4.039	1.53488	28.4	33.07	6199.38	47.5877	55.2654	218.874	128.139	89.4857	11.5808	1310.35	35.8875	14	14.1687	7.5	0	25	109.75	17.1666	54.9613	84.75	74.95	101.425	28.1845	5.9375	0	47.25	38	0	0	45.375	141.75	0	65	0	0	80	78.455	6.08332	0	5.6775	0	0	0	Female
317	1	7	22.7979	5.53075	1.20489	39.09	38.21	6663.95	70.4001	46.6075	204.308	159.143	44.4993	9.13199	845.379	55	0	0	9.06668	46.625	51	22.75	18.375	64.0833	29.5	0	26.25	0	5.84583	0	6.25	55.5	20	12.5	19	0	0	0	51.25	0	160	0	18.75	0	10.065	0	44.5	0	Male
318	1	7	16.8208	3.8265	1.30763	28.46	29.93	5003.63	38.4823	40.797	180.336	93.587	86.2703	8.41681	1123.43	55	26.5	0	0	46.625	0	22.75	10.375	24.5417	61.9375	0	73.5	87.5	0	0	38.25	10.5	0	0	19	58.7	162.964	110.5	0	0	80	78.455	0	4.70625	6.2525	0	25	0	Male
319	2	7	18.8215	4.481	1.49855	38.15	23.11	6715.01	69.2419	61.6149	194.337	96.9697	95.1845	6.87396	1154.49	47.85	0	8.58333	7.125	0	25	0	5.39582	51.25	70.5	39.2	19.25	112.738	5.9375	0	42.5	66.375	0	0	0	189	0	0	0	0	120	54	6.08332	2.57145	6.48	0	0	0	Female
320	1	7	16.8372	4.3705	1.72029	37.88	25.97	7518.52	76.9767	51.5716	236.979	122.029	113.848	8.61642	1218.02	27.5	0	0	7.5	46.625	0	22.75	21.6875	83.3125	44.5	60.5	0	87.5	14.6792	0	0	60.25	0	0	38	234.8	0	55.25	51.25	0	40	0	25	0	8.3875	0	0	0	Male
321	2	7	16.3474	4.3025	1.97452	36.3	22.08	8495.39	83.3416	81.409	250.355	117.215	126.552	10.6822	1237.2	55.425	0	0	29.625	0	0	20.25	17.1666	55.4613	175.875	35	13.75	84.5536	17.8125	0	53	22.625	22.5	0	0	47.25	0	0	45.5625	0	120	0	12.1666	0	6.48	0	0	0	Female
322	1	7	15.7226	4.073	1.6223	35.04	21.04	6607.62	62.572	50.5954	211.409	86.8993	114.015	6.84375	1143.84	27.5	0	0	6	23.3125	0	0	26.875	81.9375	109	109.833	75.75	29.1667	11.6917	0	34.75	107.625	0	0	19	0	162.964	55.25	0	0	160	0	12.5	0	4.1175	0	0	0	Male
323	2	7	17.3848	4.45975	1.11252	29.05	28.72	4961.55	38.9507	41.2308	176.369	89.0619	85.7628	11.0048	1285.55	35.8875	28	0	0	0	0	67.125	11.7708	52.6725	185.375	0	49.5	28.1845	5.9375	24.25	57.5	0	0	0	0	141.75	64.5	65	0	0	160	0	6.08332	0	7.8375	0	0	0	Female
324	2	7	24.3641	5.9855	0.943815	30.35	32.28	5649.2	46.3455	43.1471	199.269	113.969	84.7473	7.42111	1185.41	55.1375	0	0	24.9469	0	0	22.375	0	60.1725	53	39.2	29.9	56.369	0	0	21.25	34.5	0	0	0	141.75	64.5	0	45.5625	1.78125	120	0	12.1666	0	7.57	0	0	0	Female
325	1	7	15.465	3.8945	1.37917	28.83	33.2	5371.17	41.8498	44.3924	191.903	111.443	78.872	9.7156	961.429	41.25	17.6667	7.5	0	0	25.5	48.1666	11.3125	27.5208	81.25	149.667	56.5	58.3334	0	0	34.25	45	0	12.5	0	0	0	55.25	0	0	80	0	0	0	8.3875	0	0	0	Male
326	2	7	20.6023	5.26725	1.30064	33.82	23.54	6850.8	62.6258	56.1894	224.764	100.773	122.605	11.5926	1468.48	0	7	0	0	24.25	0	44.75	10.7916	89.3838	108.75	156.8	67.5	56.369	11.875	0	44.875	16	0	12.5	45.375	141.75	0	0	136.688	1.78125	160	0	12.1666	1.28572	5.6775	0	0	0	Female
327	1	7	15.7859	4.04325	1.49725	29.23	24.69	6053.75	47.8311	46.4365	217.865	93.4001	123.234	10.1947	1441.8	27.5	0	14.375	0	23.3125	0	69.5833	0	20.5208	136.5	37.4167	94.25	87.5	17.5375	26.75	24	26.5	0	0	19	117.4	217.286	0	0	0	160	0	12.5	0	5.9475	15	0	0	Male
328	2	7	22.5845	5.4415	0.800972	23.05	17.84	4358.49	27.1532	48.5437	158.09	48.5857	108.264	6.88348	1299.07	11.9625	0	0	0	0	0	44.75	11.7708	7.5	133.75	156.8	39.5917	84.5536	0	0	64.75	14	22.5	0	0	141.75	64.5	65	45.5625	0	120	39.2275	12.1666	0	3.785	0	0	0	Female
329	1	7	17.0429	3.9455	1.67124	28.07	25.37	6593.88	50.0176	53.0254	240.119	104.57	133.056	9.84146	1418.17	41.25	8.83333	0	8.88125	23.3125	0	93.6666	10.375	54	43.75	0	70	87.5	5.84583	0	41.375	45.25	40	0	0	0	162.964	221	0	0	40	117.683	6.25	0	3.965	0	19.5	0	Male
330	1	7	15.7648	3.9115	1.59331	39.18	24.43	6232.22	65.9872	56.2578	177.314	95.1452	79.9104	8.11177	1098.2	13.75	8.83333	7.5	0	0	76.5	22.75	15.5625	30.5	61.75	35	52	0	0	0	42	40.5	0	0	0	176.1	54.3214	0	51.25	0	40	0	12.5	0	5.9475	0	0	0	Male
331	2	7	18.4834	4.583	0.764019	27.94	26.61	3501.5	26.4407	30.4263	125.549	58.2333	66.6319	4.15831	945.382	0	0	0	16.6313	0	25	22.375	6.375	0	32	39.2	20.65	56.369	0	0	10.25	32	22.5	0	22.6875	0	0	260	0	1.78125	160	39.2275	0	0	0	0	25	0	Female
332	1	7	18.3369	4.6935	1.01255	24.77	30.68	4752.39	31.8216	39.9948	180.976	91.1406	87.9731	15.4282	1015.02	0	35.3333	0	0	0	51	0	0	52	226.125	0	22.75	0	0	0	37.75	15	0	0	0	0	0	0	0	0	160	0	0	0	5.9475	7.5	15.25	0	Male
333	1	7	15.3059	3.971	1.03825	36.38	30.52	4122.88	40.5376	34.4315	127.466	78.6376	48.4869	3.27424	676.652	27.5	33.5	0	17.7625	23.3125	0	0	0	64.5833	0	0	10	29.1667	8.83335	0	38	39.875	0	0	19	0	0	55.25	205	0	0	0	18.75	0	1.9825	0	0	0	Male
334	1	7	15.4558	4.2175	1.69376	30.09	29.56	7143.43	58.1007	56.776	251.571	131.974	117.639	13.2806	1561.99	41.25	8.83333	0	17.7625	46.625	25.5	69.5833	11.3125	38.375	89	149.667	141.75	87.5	11.6917	0	20.875	53	20	0	19	176.1	54.3214	55.25	0	0	80	39.2275	12.5	1.56875	6.405	0	19.75	0	Male
335	2	7	17.1507	3.92425	1.80542	27.69	21.55	7084.92	53.0174	39.1734	279.02	95.4096	179.359	9.80517	1042.85	23.925	0	0	0	0	25	22.375	11.7708	60.6725	65.5	0	27.5	56.369	0	0	21.25	31.5625	0	0	0	0	258	0	0	0	120	0	12.1666	0	1.8925	24.75	31.25	0	Female
336	1	7	13.9792	3.903	1.60148	29.46	27.37	6250.6	49.7632	58.4632	213.194	106.942	105.89	7.76272	1294.87	55	8.83333	0	0	69.9375	0	22.75	6.125	96.5	106.5	149.667	20	87.5	0	0	34.875	61	0	0	19	234.8	0	0	0	0	40	0	0	0	7.93	0	0	0	Male
337	1	7	16.1475	4.481	1.51332	40.03	24.24	6781.2	73.362	52.019	200.829	102.722	94.9276	7.91338	1135.76	41.25	0	0	26	46.625	0	69.5833	12.25	62.75	21.125	37.4167	52.25	58.3334	32.2167	0	27.75	51.25	0	0	19	234.8	0	55.25	0	0	80	0	25	0	6.405	0	0	0	Male
338	1	6	14.7773	3.72025	1.60202	33.03	29.69	5959.93	53.2095	59.2486	186.767	110.606	74.2067	10.1919	1063.55	55.67	93.85	0	0	20	0	24.6875	6.5625	48.8042	24.2841	0	32.475	82.5	0	0	37.6062	59.75	0	0	19.6875	197.5	0	0	100.5	0	0	0	12.5	3.75	7.1475	0	87	0	Male
339	2	7	16.3737	4.447	1.45709	30.63	29.95	6479.67	53.6478	62.2496	214.64	121.284	91.6328	10.861	1397.59	57.7125	27.25	0	8.31563	48.5	0	22.375	10.7916	59.9225	167.5	74.95	18.125	84.5536	21.5625	0	50.375	15	22.5	12.5	0	94.5	64.5	0	45.5625	0	160	0	12.1666	0	0	0	65	0.0025	Female
340	2	7	26.1441	6.36375	0.825534	35.98	33.11	5253.49	51.0806	40.9258	168.555	108.715	59.8588	9.27512	1054.8	23.925	0	17.1667	8.31563	48.5	0	67.125	0	17.9613	152.5	0	30.55	28.1845	5.9375	24.25	0	45.0625	22.5	0	0	47.25	0	0	0	0	160	0	18.25	0	2.16	0	43	0	Female
341	2	6	14.7715	4.0645	1.56028	33.98	29.53	6341.76	58.2356	43.9251	214.388	117.046	94.6375	9.26207	1161.66	31.19	0	10.8143	0	23.25	22.125	45	12.375	61.2041	100.575	66.5	49.7063	0	6.25	0	45.4812	15.25	0	12.75	0	211.5	52.5	105.688	0	0	40	78.455	25	0	3.73	0	25	0	Female
342	2	7	17.5842	4.4895	1.30268	35.02	23.08	5848.39	55.3563	58.5306	175.522	84.3592	90.0547	9.02918	1079.99	47.85	7	0	8.31563	0	0	62.875	10.7916	45.1725	92.1875	113.4	83.4958	56.369	23.75	0	48	11.3125	22.5	12.5	0	47.25	64.5	0	0	0	40	0	6.08332	0	8.64	0	42.75	0	Female
343	1	7	15.7216	4.022	1.43912	27.08	38.42	5788.14	42.3658	44.9895	216.191	138.988	76.7238	10.3856	1100.6	55	0	0	26.6438	23.3125	0	68.25	5.1875	27.7708	66.75	0	85.75	0	0	0	27.75	67.375	40	0	19	234.8	54.3214	0	0	0	40	39.2275	25	0	8.54	0	0	0	Male
344	1	7	17.0317	4.209	1.47655	35.42	17.73	6214.8	59.4863	47.7282	198.798	68.8732	127.34	6.18006	913.213	0	0	0	30	23.3125	0	0	28.75	54.625	44.5	112.25	0	116.667	23.3833	0	0	0	0	12.5	0	58.7	105	0	0	0	40	0	18.75	0	0	0	0	0	Male
345	1		18.5943			31.01	25.58	7525.55	63.067	46.8115	274.883	120.296	152.247	7.90277	1158.82	55	17.6667	0	9.06668	0	0	68.25	11.3125	94.5417	54	179.917	0	58.3334	11.6917	26.75	9.5	30.5	0	0	38	0	54.3214	165.75	0	2.75	0	156.91	12.5	0	7.93	0	0	0	Male
346	2	7	19.9693	4.906	1.05519	25.18	17.45	5176.74	35.2318	37.8971	201.747	56.4508	140.006	5.54623	1175.39	59.35	0	0	0	0	0	0	10.7916	68.25	189	220.65	8.94165	84.5536	5.9375	0	26.5	11.3125	0	0	0	0	293	0	0	0	80	0	12.1666	0	4.32	0	22.5	0	Female
347	2	7	14.5433	3.6565	2.09669	34.78	26.73	7666.55	72.0752	64.9661	242.56	128.056	112.606	8.81228	1278.02	63.6	7	0	29.25	0	0	22.375	21.5833	57.8838	43	0	27.125	112.738	0	0	91.625	56.3125	22.5	12.5	0	189	64.5	0	0	0	160	0	24.3333	0	7.57	7.5	0	0	Female
348	1	7	20.0104	4.923	0.858454	32.7	33.59	4226.17	37.3469	30.1541	145.724	88.7199	59.5286	5.22431	992.227	41.25	0	0	0	0	51	0	16.5	40.25	113.5	60.5	10	0	0	0	24	18.625	0	0	0	0	0	0	205	0	160	0	5.25	0	3.965	0	0	0	Male
349	2	7	15.016	4.0305	1.6	31.13	29.07	6448.81	54.2634	47.8601	226.865	117.173	108.784	7.76823	1150.67	35.8875	0	0	33.2625	24.25	50	67.125	0	64.6338	81.875	0	37.875	0	11.875	0	44.875	51.3125	0	0	0	141.75	129	0	0	0	80	0	6.08332	0	5.945	0	0	0	Female
350	1	7	15.7588	4.2345	1.42231	37.95	25.59	6022.75	61.7702	54.7096	176.594	96.3126	79.2184	7.80941	1097.85	41.25	0	7.1875	7.5	23.3125	25.5	92.3333	6.125	43.7708	45.25	60.5	39.75	0	0	0	37.375	59.25	20	0	19	58.7	0	0	102.5	9.40625	40	0	0	0	4.1175	0	0	0	Male
351	2	7	13.1855	3.835	1.57627	32.76	27.36	6044.99	53.5267	46.2342	205.516	103.355	99.9424	12.5557	1301.28	47.85	0	0	6.5	48.5	0	44.75	19.125	48.9613	131.375	114.15	77.05	84.5536	0	0	39.375	16	22.5	12.5	0	189	0	0	0	0	40	0	24.3333	0	8.64	24.75	0	0	Female
352	1	6	14.4497	3.784	1.78473	31.99	26.12	6753.43	58.3928	50.4265	233.757	110.255	120.406	8.81935	1238.4	0	0	0	37.45	0	24.5625	47.1875	0	92.2751	73.5	0	69.1	0	0	24.5	30.65	14.9333	40	0	39.375	148.125	56.5	0	150.75	0	40	0	12.5	0	0	0	26	0	Male
353	2	7	16.1929	4.4385	1.05125	30.56	29.97	4665.95	38.5412	39.1803	161.004	87.407	73.4486	10.0921	1072.93	35.8875	7	0	0	0	25	67.125	17.1666	21.5	157.125	71.5	0	84.5536	0	0	41.75	35.0625	45	0	0	47.25	0	65	45.5625	0	160	0	0	0	6.48	16.5	0	0	Female
354	2	6	18.894	4.396	1.14127	33.02	25.72	5017.04	44.7678	32.3782	176.107	80.656	94.3598	7.54861	943.258	21.44	0	0	6.5	23.25	22.125	22.5	6.1875	24.3375	150.025	0	20.4167	43.6666	0	0	22.325	65.75	0	0	0	52.875	105	158.531	0	0	40	0	18.75	0	0	0	0	0	Female
355	2	7	19.3083	4.651	1.49521	33.34	25.03	6954.24	62.6709	47.638	239.263	108.77	127.322	7.28068	1448.63	11.9625	14	25.75	0	24.25	50	0	23.5416	112.961	53	0	10	84.5536	0	0	21.25	58.9375	0	0	22.6875	94.5	129	195	45.5625	0	160	0	12.1666	1.28572	1.8925	0	0	0	Female
356	2	7	18.6103	4.4555	1.72866	30.68	26.77	7702.06	63.8561	46.2222	283.422	128.848	145.634	10.7221	1104.71	25.5	0	0	15	24.25	75	44.75	24.5208	104	48	39.2	19.625	0	0	0	34.625	38.625	22.5	0	0	0	0	260	0	0	80	0	12.1666	0	5.945	0	0	0	Female
357	1	7	18.4727	4.62975	1.52275	34.19	29.93	7049.95	65.148	51.1019	235.565	131.894	101.532	6.18196	1118.05	55	0	0	27.2	46.625	0	45.5	21.6875	98.7708	0	0	0	87.5	5.84583	0	14	83	0	12.5	0	234.8	0	0	0	0	0	156.91	25	6.275	8.54	0	0	0	Male
358	1	7	16.0465	4.226	1.11897	28.17	33.73	4728.76	35.9968	46.7437	162.816	99.7	62.6166	6.43283	1004.62	43.25	8.83333	0	17.7625	0	25.5	68.25	6.125	12.2708	19.25	0	36.75	116.667	11.6917	0	14	44.375	0	0	19	234.8	0	0	51.25	0	80	0	0	0	4.27	0	26	0	Male
359	1	7	19.9289	4.94	1.29263	31.23	24.16	6385.59	53.9032	48.0532	223.599	96.4419	124.9	8.23243	1283.04	55	8.83333	0	8.88125	0	0	22.75	16.5	79.7708	187.5	0	28.25	116.667	0	0	10.25	51.75	0	0	19	234.8	0	55.25	51.25	0	40	0	12.5	1.56875	8.54	0	0	0	Male
360	1	7	18.9785	4.9145	0.840655	31.32	30.99	4131.4	34.9749	25.4039	150.4	80.0155	67.9968	6.29916	723.645	41.25	0	0	0	0	76.5	22.75	23.5625	29.5	49.25	135.333	26	0	5.84583	0	16.875	30.5	0	0	0	58.7	0	55.25	0	0	80	0	12.5	0	1.9825	0	0	0	Male
361	2	7	19.0438	4.532	1.65693	35.07	30.48	7509.22	71.1778	60.7975	239.876	143.031	96.726	13.1964	1052.65	47.85	7	0	0	24.25	50	20.25	11.7708	25.9613	117.5	0	10	56.369	0	24.25	39.875	61.875	45	12.5	0	141.75	0	130	0	0	40	0	12.1666	0	10.5325	0	0	0	Female
[truncated: 93 more columns]
